**Title:** H3.1K27me1 maintains transcriptional silencing and genome stability by preventing GCN5-mediated histone acetylation

**Authors:**

Jie Dong<sup>1#</sup>, Chantal LeBlanc<sup>1#</sup>, Axel Poulet<sup>1#</sup>, Benoit Mermaz<sup>1</sup>, Gonzalo Villarino<sup>1</sup>, Kimberly M. Webb<sup>2</sup>, Valentin Joly<sup>1</sup>, Josefina Mendez<sup>1</sup>, Philipp Voigt<sup>2</sup> and Yannick Jacob<sup>1\*</sup>

**Affiliations:**

<sup>1</sup> Yale University, Department of Molecular, Cellular and Developmental Biology, Faculty of Arts and Sciences; 260 Whitney Avenue, New Haven, Connecticut 06511, United States.

<sup>2</sup> Wellcome Centre for Cell Biology, School of Biological Sciences, University of Edinburgh, Edinburgh EH9 3BF, United Kingdom.

# These authors contributed equally to this manuscript.

\* To whom correspondence should be addressed. Email: [yannick.jacob@yale.edu](mailto:yannick.jacob@yale.edu)

## 1 **Abstract**

2 In plants, genome stability is maintained during DNA replication by the H3.1K27  
3 methyltransferases ATXR5 and ATXR6, which catalyze the deposition of K27me1 on replication-  
4 dependent H3.1 variants. Loss of H3.1K27me1 in *atxr5 atxr6* double mutants leads to  
5 heterochromatin defects, including transcriptional de-repression and genomic instability, but the  
6 molecular mechanisms involved remain largely unknown. In this study, we identified the conserved  
7 histone acetyltransferase GCN5 as a mediator of transcriptional de-repression and genomic instability  
8 in the absence of H3.1K27me1. GCN5 is part of a SAGA-like complex in plants that requires ADA2b  
9 and CHR6 to mediate the heterochromatic defects of *atxr5 atxr6* mutants. Our results show that  
10 Arabidopsis GCN5 acetylates multiple lysine residues on H3.1 variants *in vitro*, but that H3.1K27  
11 and H3.1K36 play key roles in inducing genomic instability in the absence of H3.1K27me1. Overall,  
12 this work reveals a key molecular role for H3.1K27me1 in maintaining genome stability by restricting  
13 histone acetylation in plants.

## 14 **Keywords (3-10):**

15 Transcriptional de-repression, genome instability, histone methylation and acetylation,  
16 heterochromatin

## 17 **Introduction**

18 Genome and epigenome instability have been implicated in many human diseases, including cancer  
19 and neurodegenerative disorders. In proliferating cells, key mechanisms are required to properly copy  
20 DNA and different epigenetic states of the genome in the context of ongoing transcription and DNA  
21 repair. Chromatin replication is therefore a complex molecular operation that can lead to genomic  
22 rearrangements and other types of deleterious mutations in the absence of mechanisms preserving  
23 genome stability (1, 2).

24 Epigenetic information plays multiple regulatory roles during S phase of the cell cycle that are  
25 required to maintain genome stability in eukaryotes. In plants, one of the most well-studied genome  
26 maintenance pathways involves the histone post-translational modification (PTM) H3K27me1. The  
27 loss of H3K27me1 results in the loss of transcriptional silencing at heterochromatic loci and defects  
28 in the structural organization of heterochromatin (3, 4). In addition, decreased levels of H3K27me1  
29 induce genome instability characterized by the presence of an excess of repetitive DNA (e.g.  
30 transposons) mainly in pericentromeric heterochromatin (hereafter referred to as heterochromatin  
31 amplification) (5). H3K27me1 is catalyzed by the plant-specific histone methyltransferases ATXR5  
32 and ATXR6 (ATXR5/6), which are recruited to replication forks during DNA replication (3, 6, 7).  
33 Biochemical and structural studies have revealed that the SET domains of ATXR5/6 can methylate  
34 replication-dependent H3.1 variants, but not replication-independent H3.3 variants (8). These  
35 observations indicate that ATXR5/6 maintain H3K27me1 by methylating newly synthesized H3.1  
36 variants (H3.1K27me1) during DNA replication, which protects against transcriptional de-repression  
37 and heterochromatin amplification. The precise molecular mechanism responsible for  
38 heterochromatin amplification in the absence of H3.1K27me1 remains unknown. However, a  
39 previous study suggested that transcriptional de-repression in the heterochromatin of *atxr5/6* double  
40 mutant plants is the cause of the genomic instability phenotype, potentially by inducing collisions  
41 between the transcription machinery and replication forks, and/or through R-loop formation (9).  
42 Based on this model, it is predicted that ATXR5/6-catalyzed H3.1K27me1 plays a key role in  
43 blocking transcriptional activity in the heterochromatin of plants.

44 Many PTMs on histones function as recruitment signals for chromatin “reader” proteins, which  
45 promote specific cellular activities like transcription at genomic regions enriched in these histone

46 PTMs (10). Multiple studies have shown that methylation at H3K27 regulates transcriptional activity  
47 through various mechanisms, which are related to the specific methylation level (i.e., me1, me2 or  
48 me3) at K27. For example, H3K27me3 is involved in the recruitment of the repressive PRC1 complex  
49 in animals (11), and this role is conserved in plants (12). In contrast to H3K27me3, H3K27me1 and  
50 H3K27me2 are not as well characterized in animals, but they have specific effects on the regulation  
51 of transcriptional activity that do not appear to involve recruitment of chromatin readers. In mouse  
52 embryonic stem cells (ESCs), H3K27me2 is present on the majority of total histone H3 in chromatin  
53 and safeguards against unintended transcription by blocking CBP/p300-mediated H3K27 acetylation  
54 (H3K27ac) at non-cell-type-specific enhancers (13). In contrast, H3K27me1 is present at less than  
55 5% of total H3s in ESCs, and is associated with transcriptionally active genes and contributes to their  
56 expression (13). However, the mechanism by which H3K27me1 performs this function remains  
57 unknown. Predicting the role of ATXR5/6-catalyzed H3K27me1 in plants based on comparative  
58 analysis with H3K27me1/me2 in animals is challenging, as it shares the same methylation level of  
59 transcriptionally-permissive H3K27me1, but its function in heterochromatin silencing in plants  
60 suggests properties related to H3K27me2. An additional similarity between plant H3K27me1 and  
61 animal H3K27me2 is that these histone PTMs are widely distributed and very abundant in their  
62 respective genomes. In Arabidopsis, H3K27me1 was estimated to be present on more than 50% of  
63 total H3 in inflorescence tissues (14), and it is enriched in transcriptionally silent regions of the  
64 genome (5). These observations suggest that H3.1K27me1 in plants may serve to block H3.1K27ac,  
65 providing a potential molecular mechanism for the role of ATXR5/6 in preventing transcriptional de-  
66 repression and genomic instability in plants.

67 In this work, we identify the conserved histone acetyltransferase GCN5 as a mediator of  
68 transcriptional de-repression and heterochromatin amplification in the absence of H3.1K27me1 in  
69 plants. GCN5 cooperates with the transcriptional co-activator ADA2b and the chromatin remodeler  
70 CHR6 to induce these heterochromatic phenotypes. Our results also show that H3.1K36 plays a key  
71 role in inducing genome instability and transcriptional de-repression in the absence of H3.1K27me1,  
72 and that H3.1K27me1 interferes with GCN5-mediated acetylation at both H3.1K27 and H3.1K36.  
73 Overall, these results demonstrate the key role played by GCN5-mediated histone acetylation in  
74 contributing to the heterochromatin phenotypes observed in the absence of ATXR5 and ATXR6 in  
75 plants.

## 76 **Results**

### 77 **Transcriptional de-repression and heterochromatin amplification in the absence of** 78 **H3.1K27me1 are suppressed in *gcn5* mutants**

79 One mechanism by which H3.1K27me1 might interfere with transcription in heterochromatin of  
80 plants is by preventing the deposition of H3.1K27ac, as methylation and acetylation at H3K27 have  
81 been shown to act antagonistically in other biological systems (15, 16). H3K27ac is catalyzed by  
82 multiple histone acetyltransferases in eukaryotes, including the widely conserved protein GCN5 (17-  
83 21). The Arabidopsis genome contains a single gene encoding a GCN5 ortholog (22). To assess if  
84 Arabidopsis GCN5 mediates the heterochromatin phenotypes associated with loss of H3.1K27me1,  
85 we created an *atxr5/6 gcn5* triple mutant by crossing a T-DNA insertion allele (SALK\_030913) of  
86 *GCN5* into the hypomorphic *atxr5/6* mutant background (Supplemental Figure 1A) (3). Flow  
87 cytometry analyses showed strong suppression of heterochromatin amplification in the triple mutant  
88 as represented by the loss of the characteristic broad peaks corresponding to 8C and 16C  
89 endoreduplicated nuclei in *atxr5/6* mutants (Figure 1A). We also observed by microscopy that the  
90 heterochromatin decondensation phenotype of *atxr5/6* plants is suppressed in the *atxr5/6 gcn5* triple  
91 mutant (Figure 1B, Supplemental Figure 1B). A role for GCN5 in inducing genomic instability in  
92 *atxr5/6* was confirmed by using a different mutant allele of *gcn5* generated by temperature-optimized  
93 CRISPR/Cas9 (Supplemental Figure 1A, C and D) (23).

94 To measure the impact of GCN5 on transcriptional de-repression in *atxr5/6* mutants, we performed  
95 RNA-seq analyses and observed widespread suppression of transposable element (TE) reactivation  
96 in the *atxr5/6 gcn5* triple mutants compared to *atxr5/6*, although some TEs remained de-repressed  
97 compared to Col (Figure 1C and Supplemental Table 1). Although *GCN5* has a genome-wide impact  
98 on transcription as shown by the 1781 misregulated genes in *gcn5* single mutants (Figure 1D,  
99 Supplemental Table 2), none of the known transcriptional suppressors of *atxr5/6* mutants (*SERRATE*  
100 [*SE*], *AtTHP1*, *AtSAC3B*, *AtSTUbL2*, *AtMBD9* and *DDMI*) are downregulated in *gcn5* mutants or  
101 *atxr5/6 gcn5* triple mutants (Supplemental Figure 1E) (9, 24), indicating that suppression of the  
102 heterochromatin phenotypes in *atxr5/6 gcn5* is not the result of decreased expression levels of these  
103 genes.

104 **GCN5 functions with ADA2b and CHR6 to disrupt heterochromatin in the absence of**  
105 **H3.1K27me1**

106 GCN5 is a member of the multi-subunit SAGA complex which acts as a transcriptional coactivator  
107 in yeast and animals in part by modifying chromatin (25). Key components of this complex are the  
108 proteins GCN5, ADA2, ADA3 and SGF29, which form the histone acetylation module of SAGA  
109 (Figure 2A). The Arabidopsis genome contains single genes encoding GCN5 and ADA3 and two  
110 genes each encoding ADA2 (*ADA2a* and *ADA2b*) and SGF29 (*SGF29a* and *SGF29b*) (26). *gcn5* and  
111 *ada2b* single mutants show pleiotropic phenotypes, which are also shared by the *atxr5/6 gcn5* and  
112 *atxr5/6 ada2b* mutants, respectively (Supplemental Figure 2A) (27). To test if ADA2b is also required  
113 for inducing the heterochromatin phenotypes of *atxr5/6* mutants, we created an *atxr5/6 ada2b* triple  
114 mutant and observed, similarly to *atxr5/6 gcn5* mutants, that genomic instability is suppressed in that  
115 background (Figure 2B). This result is supported by altered expression of *BRCAL*, which functions in  
116 eukaryotes as a DNA-damage response gene involved in maintaining genome stability (28, 29). As  
117 previously reported, *BRCAL* levels are upregulated in *atxr5/6* (4), and our results show that both  
118 *ADA2b* and *GCN5* are required for this induction (Figure 2C and Supplemental Figure 2B). Similarly  
119 to *gcn5*, an *ada2b* mutation in *atxr5/6* suppresses transcriptional de-repression of the heterochromatic  
120 *TSI* DNA repeat (Figure 2D and Supplemental Figure 2C).

121 Next, we generated an *atxr5/6 ada3* triple mutant, but unlike *atxr5/6 ada2b*, it did not suppress the  
122 genome instability phenotype associated with the *atxr5/6* double mutant (Figure 2B). The reported  
123 ADA3 protein in Arabidopsis displays low similarity to the ADA3 orthologs from yeast and human  
124 (26.3% and 16.3%, respectively, compared to >35% similarity for GCN5 and ADA2b (30)), and  
125 might therefore have diverged and not be required for GCN5 and ADA2b to acetylate histones in  
126 plants. To further investigate whether other modules of SAGA mediate the heterochromatin  
127 phenotypes associated with the loss of H3.1K27me1, we created triple mutant combinations between  
128 *atxr5/6* and mutated alleles of genes proposed to encode subunits of the deubiquitination module of  
129 SAGA in plants (Figure 2A). Our results show that the Arabidopsis orthologs of ENY2, UBP22 and  
130 SGF11 are not required for inducing heterochromatin amplification, indicating that the  
131 heterochromatin phenotypes of *atxr5/6* are independent of the deubiquitination function of SAGA  
132 (Supplemental Figure 2D). Finally, we created triple mutant combinations between *atxr5/6* and *chr5*  
133 or *chr6*. CHR5 and CHR6 are both chromatin remodeling enzymes that have been proposed to be

134 present in the SAGA complex in plants (Figure 2A). CHR5 is the most closely related plant protein  
135 to CHD1-type chromatin remodelers that are part of the SAGA complex in yeast and mammals (26,  
136 30), while CHR6 (also known as CHD3/PICKLE) has been shown to co-purify with SAGA subunits  
137 from Arabidopsis tissue (31). Our results show that heterochromatin amplification is suppressed in  
138 the *atxr5/6 chr6* triple mutant, but not *atxr5/6 chr5* (Figure 2E). Overall, these results indicate  
139 essential roles for ADA2b and CHR6 in mediating the heterochromatic phenotypes observed in the  
140 absence of H3.1K27me1.

### 141 **GCN5-mediated H3.1K27ac induces the heterochromatin defects associated with loss of** 142 **H3.1K27me1**

143 The GCN5 orthologs in yeast and mammals have been shown to acetylate multiple lysine residues of  
144 histone H3 (i.e., K9, K14, K18, K23, K27 and K36) *in vitro*, however, substrate specificity in the  
145 context of different histone H3 variants has never been tested for any GCN5 ortholog (18, 20). In  
146 addition, while the Arabidopsis GCN5 has been shown to acetylate H3K9 and H3K14 on H3 peptides  
147 *in vitro* (32), acetylation at H3K27 by the Arabidopsis GCN5 ortholog has not been tested.

148 To investigate the substrate specificity of GCN5, we performed *in vitro* histone lysine  
149 acetyltransferase (HAT) assays using recombinant nucleosomes containing either plant histone H3.1  
150 or H3.3 variants. We recombinantly expressed and purified an Arabidopsis protein complex  
151 composed of GCN5 and ADA2b (Supplemental Figure 3). Our results show that GCN5 has HAT  
152 activity at K9, K14, K18, K23, K27 and K36 of histone H3 (Figure 3A). In contrast to ATXR5/6, the  
153 enzymatic activity of GCN5 at H3K27 is not regulated by H3 variants, as H3.1 and H3.3 nucleosomes  
154 show equivalent acetylation levels in our HAT assays (Figure 3A). As controls for these results, we  
155 used H3.1K27ac and H3.3K27ac peptides to validate that the H3K27ac antibody used did not show  
156 preference for H3.1 or H3.3 (Figure 3B), and we validated the specificity of this antibody by using  
157 H3K27M nucleosomes (Figure 3C). Similarly to H3K27, we did not observe any major difference in  
158 histone acetyltransferase activity between H3.1 and H3.3 nucleosomes at the other lysine substrates  
159 of Arabidopsis GCN5 (Figure 3A). We also confirmed that H3.1K27me1 prevents acetylation by  
160 GCN5 at K27 by using recombinant nucleosomes mono-methylated at K27 (Figure 3D). To assess if  
161 H3.1K27ac mediates the heterochromatin phenotypes present in *atxr5/6* mutants *in vivo*, we

162 introduced into wild-type plants an H3.1K27Q transgene. Replacement of lysine (K) with glutamine  
163 (Q) in histones has been used for *in vivo* chromatin studies to partially mimic the acetylated state of  
164 histone lysine residues (33-35). Our analyses of first-generation transformed (T1) plants show that  
165 expression of H3.1K27Q in wild-type plants is sufficient to induce transcriptional de-repression of  
166 the heterochromatic *TSI* repeat (Figure 3E) and activation of the genome instability marker *BRCA1*  
167 (Figure 3F), which are both specifically upregulated in *atxr5/6* mutants. Overall, these results support  
168 a specific role for GCN5-mediated H3.1K27ac in inducing the heterochromatic phenotypes associated  
169 with loss of H3.1K27me1 in *atxr5/6* mutants.

### 170 **H3.1K36 is required to induce genome instability in the absence of H3.1K27me1**

171 Our *in vitro* results suggest that, in addition to K27, other lysine residues on H3.1 could contribute to  
172 GCN5-mediated genomic instability in the absence of H3.1K27me1. To assess this, we set up a  
173 suppressor screen based on *in vivo* replacement of histone H3.1 with the point mutant H3.1S28A.  
174 Replacement of serine with alanine on H3.1 variants at position 28 (H3.1S28A) generates H3.1  
175 substrates that cannot be methylated by ATXR5/6 (Figure 4A) (36). In contrast, H3.1S28A can still  
176 be methylated at K27 by plant PRC2-type complexes and acetylated by the GCN5-ADA2b complex,  
177 albeit at lower efficiencies (Supplemental Figure 4A-B). We transformed the H3.1S28A transgene  
178 into a mutant *Arabidopsis* background expressing a reduced amount of endogenous histone H3.1 (i.e.,  
179 *h3.1* quadruple mutant (8)) and observed in T1 plants the phenotypes associated with loss of  
180 H3.1K27me1, including genomic instability as detected by flow cytometry and increased levels of  
181 the genome instability marker gene *BRCA1* (Figure 4B-C), and transcriptional de-repression of the  
182 heterochromatic *TSI* DNA repeat (Figure 4D). These results indicate that expression of H3.1S28A in  
183 plants generates phenotypes similar to *atxr5/6* mutants due to loss of H3.1K27me1. We then  
184 introduced a series of H3.1S28A expression constructs containing a second mutation (Lys to Arg  
185 replacement) at a residue known to be acetylated by GCN5 into the *h3.1* quadruple mutant, and T1  
186 plants were assessed for the phenotypes associated with loss of H3.1K27me1. This targeted screen  
187 identified H3.1K36 as being essential for inducing genome instability, as flow cytometry analyses  
188 demonstrated that H3.1S28A K36R suppresses heterochromatin amplification, while the other  
189 targeted mutations do not (Figure 4B). The H3.1S28A K36R replacement line also rescued the  
190 increased expression of *BRCA1* (Figure 4C) and transcriptional de-repression of *TSI* (Figure 4D).



191 Furthermore, expression of the H3.1S28A K36R mutant did not generate a serrated leaves phenotype  
192 as seen in all the other H3.1S28A lines (Supplemental Figure 5). As mutations at K9, K14, K18 and  
193 K23 on the H3.1 variant did not suppress the phenotypes associated with the H3.1S28A mutation,  
194 these results indicate a specific role for H3.1K36 in inducing genome instability in the absence of  
195 H3.1K27me1.

196 GCN5-mediated acetylation of H3.1K36 could be required to induce the heterochromatin defects of  
197 *atxr5/6* mutants. One prediction from this model is that increasing histone methylation at H3.1K36  
198 (H3.1K36me) would result in the suppression of the *atxr5/6* mutant phenotypes, as H3.1K36me  
199 would antagonize H3.1K36 acetylation by GCN5. To test this, we constitutively expressed (using the  
200 35S promoter) all five Arabidopsis H3K36 methyltransferases (*SDG4*, *SDG7*, *SDG8*, *SDG24*, and  
201 *SDG26*) in *atxr5/6* mutants (37, 38). We performed flow cytometry analyses on T1 plants and found  
202 that overexpression of *SDG24* (*SDG24-OX*) strongly suppresses the heterochromatin amplification  
203 phenotype (Figure 4E). We did not observe a similar effect in T1 lines overexpressing *SDG4*, *SDG7*,  
204 *SDG8* or *SDG26* (Supplemental Figure 6). The ability of *SDG24-OX* to suppress heterochromatin  
205 amplification is dependent on SDG24 having a functional methyltransferase (SET) domain, as  
206 overexpression of an *SDG24* variant containing a point mutation (Y140N) in a conserved residue  
207 essential for SET domain activity does not suppress the phenotype (Figure 4E) (5, 39). We performed  
208 ChIP-qPCR experiments with *SDG24-OX* plants and detected an increase in H3K36me3 levels at  
209 heterochromatic regions (*Ta3*, *At1G38250*, *At4G06566*) known to be transcriptionally de-repressed  
210 in *atxr5/6* mutants (Figure 3F). Taken together, these results suggest that H3.1K36ac is required to  
211 induce transcriptional de-repression and heterochromatin amplification in the absence of  
212 H3.1K27me1.

### 213 **Loss of H3.1K27me1 in plants increases H3K27ac and H3K36ac deposition in heterochromatin**

214 Our results support a model in which GCN5 acetylates both H3.1K27 and H3.1K36 in the absence of  
215 H3.1K27me1 to induce the heterochromatin phenotypes of *atxr5/6* mutants. To assess if H3.1K27me1  
216 depletion leads to an increase of H3K27ac and H3K36ac *in vivo*, we performed ChIP-seq with  
217 reference exogenous genome (ChIP-Rx) for H3K27ac and H3K36ac in Col (WT), *atxr5/6*, *gcn5* and  
218 *atxr5/6 gcn5* (40). We found that both histone marks are enriched at the 5' end of protein-coding

219 genes after the transcriptional start site (TSS) in Arabidopsis (Figure 5A), and this spatial distribution  
220 correlates with transcriptional activity, albeit not in a linear relationship (Supplemental Figure 7) (41,  
221 42). Comparative analysis of H3K27ac and H3K36ac in Col and *gcn5* single mutants demonstrates  
222 that loss of GCN5 results in a decrease of H3K27ac and H3K36ac at euchromatic genes (Figure 5A).

223 Focusing on heterochromatin, which we defined based on previously identified chromatin states in  
224 Arabidopsis (Supplemental Table 3) (43), we identified multiple regions that were enriched in both  
225 H3K27ac and H3K36ac in *atxr5/6* but not in Col plants (Figure 5B-C and Supplemental Table 4).  
226 H3K27ac and H3K36ac enrichment in heterochromatin was greatly decreased in *atxr5/6 gcn5* triple  
227 mutants (Figure 5B-C), suggesting that higher levels of H3K27ac and H3K36ac in heterochromatic  
228 regions of *atxr5/6* are almost completely dependent on GCN5. We next tested if the de-repressed  
229 TEs in *atxr5/6* identified in by RNA-seq overlap or are in close proximity (+/- 3kb) to the genomic  
230 regions showing increased levels of H3K27ac and H3K36ac in *atxr5/6*. We observed a large overlap  
231 between transcriptionally de-repressed genomic regions and regions enriched in H3K27ac and  
232 H3K36ac in *atxr5/6* mutants (Figure 5D). The regions shown in Figure 5D likely represent a low  
233 estimate of the total overlap between H3K27ac/H3K36ac regions and transposon reactivation due to  
234 the inherent lack of sensitivity of ChIP-seq and RNA-seq experiments in backgrounds showing low-  
235 level TE de-repression, like *atxr5/6* mutants. For example, we found that a 5-fold increase in  
236 sequencing depth (75 versus 15 million reads) in our RNA-seq experiments resulted in a 43% increase  
237 in the number of de-repressed TEs identified in *atxr5/6* (446 TEs versus 312 TEs) (Supplemental  
238 Table 1). To further demonstrate the sensitivity issue associated with low-level de-repression in  
239 *atxr5/6*, we performed RT-qPCR on multiple TEs that showed an increase in H3K27ac in *atxr5/6*,  
240 but were not identified as differently expressed by RNA-seq. For many of these TEs, including  
241 *Atlg36040* and *At5g29602* (Supplemental Figure 8), we observed higher expression levels in *atxr5/6*  
242 compared to wild-type plants, thus confirming the limitations of genome-wide sequencing for  
243 detecting low-level TE de-repression in *atxr5/6* mutants. Taken together, these results demonstrate  
244 that the loss of H3.1K27me1 in *atxr5/6* mutants leads to GCN5-dependent increase of H3K27ac and  
245 H3K36ac in heterochromatin.

246 **H3.1K27me1 regulates the deposition of H3.1K36ac by GCN5**

247 Methylation and acetylation at H3K27 have an antagonistic relationship in the genome of animals,  
248 which is mediated by the interplay between the H3K27 methyltransferase complex PRC2 (H3K27me)  
249 and the histone acetyltransferases p300 and CBP responsible for H3K27ac (15, 16). Our work  
250 supports a similar relationship in plants at K27 on H3.1 variants that is mediated by different enzymes,  
251 with ATXR5/6-catalyzed H3.1K27me1 preventing the acetylation of H3.1K27 by GCN5. Interactions  
252 between post-translational modifications on different histone residues also contribute to chromatin  
253 regulation in eukaryotes. One example of this is the inhibition of PRC2 activity towards H3K27 when  
254 H3K36 is di- or trimethylated on the same histone (44-46). This suggests that the activity of other  
255 chromatin-modifying enzymes may be affected by crosstalk between modified forms of H3K27 and  
256 H3K36. To assess if acetylation of H3.1K36 by GCN5 is regulated by H3.1K27me1, we performed  
257 *in vitro* HAT assays using recombinant plant nucleosomes containing either unmodified H3.1 or  
258 H3.1K27me1. In these assays, we consistently observed a 40% decrease in the levels of acetylation  
259 at H3.1K36 on nucleosomes mono-methylated at H3.1K27 compared to unmodified H3.1 (Figure  
260 6A-B). This effect of H3.1K27me1 on Arabidopsis GCN5 activity appears to be specific to H3.1K36,  
261 as GCN5-mediated acetylation of H3.1K9 was not affected by mono-methylation at K27. We also  
262 tested if reciprocally, methylation at H3.1K36 would affect acetylation at K27 by GCN5. We did not  
263 observe any difference in acetylation levels at K27 using K36me0 and K36me3 nucleosomes (Figure  
264 6C). Overall, these results suggest that ATXR5/6-catalyzed H3.1K27me1 in plants interferes with  
265 GCN5-mediated acetylation at both H3.1K27 and H3.1K36.

## 266 **Discussion**

267 Previous work had suggested that transcriptional reactivation of heterochromatic regions is  
268 responsible for inducing genomic instability in the absence of H3.1K27me1 in plants (9). However,  
269 the mechanism by which H3.1K27me1 prevents transcriptional de-repression in heterochromatin had  
270 remained unknown. Our study supports a model where ATXR5/6-mediated H3.1K27me1 serves to  
271 prevent a SAGA-like complex that includes GCN5, ADA2b and CHR6 from acetylating the H3.1  
272 variant and initiating transcriptional de-repression (Figure 6D). K27me1 is the most abundant post-  
273 translational modification on H3.1K27 in plants (14), and our results suggest that it plays a role  
274 analogous to the one proposed for PRC2-catalyzed H3K27me2 in animals, which is present on 50-  
275 70% of total histone H3 in mouse embryonic stem cells, blocks H3K27ac, and prevents spurious  
276 transcription (13, 47, 48). In animals, p300 and CBP are the main histone acetyltransferases  
277 contributing to H3K27ac in the absence of PRC2-mediated H3K27 methylation (15, 16). Our results  
278 indicate that in plants, GCN5 plays this role. However, transcriptional de-repression is not completely  
279 abolished in *gcn5* mutants (Figure 1C), thus suggesting that at least one of the five p300/CBP  
280 orthologs in Arabidopsis (HAC1/2/4/5/12 (32, 49)) may also contribute to higher histone acetylation  
281 levels in the absence of H3.1K27me1.

282 Our work shows that GCN5-catalyzed histone acetylation plays a key role in mediating transcriptional  
283 activation in *atxr5/6* mutants. The role of GCN5 as a transcriptional co-activator in other biological  
284 systems is well defined, thus supporting a conserved function for GCN5 in all eukaryotes. In  
285 mammals, H3K27ac is found at active transcriptional enhancers (50, 51), but a recent study in mouse  
286 ESCs showed that H3K27ac depletion at enhancers does not affect gene expression (52). This  
287 suggests that H3K27ac works redundantly or synergistically with other chromatin features to specify  
288 active enhancers. In maize and rice, approximately 30% of H3K27ac sites are found in intergenic  
289 regions (42, 53), which support a conserved role for H3K27ac in marking enhancers and contributing  
290 to their activity in eukaryotes. However, a recent report has shown that only a small subset of  
291 H3K27ac sites (0.5%-3%) are located upstream of the TSS in Arabidopsis, which argues for plant  
292 species-specific variation in the types of chromatin features defining active enhancers (54). Aside  
293 from marking enhancers, H3K27ac has also been found to be enriched close to the TSS of  
294 transcriptionally active protein-coding genes in mammals, maize, rice and Arabidopsis (42, 53-55), a  
295 result that we confirmed for Arabidopsis in our CHIP-Rx experiments. H3K36ac has also been shown

296 in multiple biological systems to co-localize with H3K27ac at the TSS of transcriptionally-active  
297 regions of the genome (41, 55). These observations suggest important roles for TSS-localized  
298 H3K27ac and H3K36ac in mediating transcriptional activity. Precisely mapping the H3K27ac and  
299 H3K36ac regions in the heterochromatin of *atxr5/6* mutants in relation to the TSS of de-repressed  
300 TEs is challenging, as TSSs are not well defined for TEs. Nevertheless, we did observe H3K27ac and  
301 H3K36ac peaks in *atxr5/6* at the 5' end of annotated TEs (Figure 5C, Supplemental Figure 8), which  
302 would support a similar mode of action for H3K27ac/H3K36ac in regulating transcription of genes  
303 and TEs.

304 Yeast and animal GCN5 have been shown to have the ability to acetylate multiple lysines (K9, K14,  
305 K18, K23, K27 and K36) in the N-terminal tail of histone H3 (18, 20). Our *in vitro* results using  
306 recombinant nucleosomes suggest that the GCN5 ortholog in Arabidopsis also has broad substrate  
307 specificity. However, the specificity of ATXR5/6 for H3K27 and results from this study suggest a  
308 critical role for K27 over other target sites of GCN5 on H3.1 variants. One observation supporting a  
309 unique role for H3.1K27ac over other acetylated lysines of H3 in Arabidopsis comes from  
310 experiments showing that increased levels of cytosolic acetyl-CoA (the essential cofactor for protein  
311 acetylation) increase H3 acetylation in plants (17). Results from these experiments show that H3K27  
312 is predominantly acetylated over other lysine residues of H3 (i.e. H3K9, H3K14 and H3K18; H3K36  
313 was not assessed in that study), in a manner dependent on GCN5. Higher levels of H3K27ac are  
314 observed in genic regions, and this correlates with higher transcriptional levels for genes showing  
315 gains in H3K27ac (17). Similarly to H3.1K27ac, our *in vitro* and *in vivo* results implicate H3.1K36ac  
316 as playing a key role in mediating the heterochromatin phenotypes of *atxr5/6*. However, these results  
317 do not rule out the possibility that other acetylated sites (e.g. K9, K14, K18 and K23) on H3.1 also  
318 contribute to mediating transcriptional de-repression and genomic instability in plants, for example  
319 by acting in a functionally redundant manner. Our *in vitro* histone acetyltransferase assays indicate  
320 that deposition of H3K36ac by GCN5 is negatively regulated by H3.1K27me1, although the  
321 molecular mechanism responsible for this crosstalk remains unknown. Previous structural work  
322 characterizing a protein complex composed of the histone acetyltransferase (HAT) domain of GCN5  
323 from *Tetrahymena thermophila* and a phosphorylated histone H3 peptide (aa. 5-23) showed that the  
324 HAT domain interacts with the sidechain of glutamine 5 (Q5), located 9 amino acids upstream of the  
325 target lysine (K14) on the H3 peptide (56). As H3K27 is similarly located 9 amino acids upstream

326 H3K36, this suggests that the HAT domain of GCN5 in Arabidopsis may interact with the sidechain  
327 of H3K27 to regulate the catalytic activity of GCN5 at H3K36. Structural studies of the HAT domain  
328 of Arabidopsis GCN5 will be needed to validate this model.

329 The catalytic specificity of ATXR5/6 for replication-dependent H3.1 variants together with the  
330 observation that heterochromatin amplification is suppressed when the H3.1 chaperone CAF-1 is  
331 mutated have led to a model where the H3.1 variant plays a specific role in maintaining genome  
332 stability (8). One mechanism that could explain the requirement for H3.1 variants to induce the  
333 *atxr5/6* mutant phenotypes would be if GCN5, similarly to ATXR5/6, specifically acetylates K27 in  
334 H3.1 variants. However, our results show no difference in enzymatic activity for GCN5 on H3.1 and  
335 H3.3 variants (Figure 3A). Therefore, GCN5 is unlikely to be directly involved in mediating the H3.1  
336 requirement for inducing the *atxr5/6* mutant phenotypes. An alternative mechanism to explain the  
337 role for H3.1 variants in this process could be that downstream chromatin readers mediating  
338 transcriptional de-repression and heterochromatin amplification interact with H3.1K27ac and/or  
339 H3.1K36ac, but not H3.3K27ac and/or H3.3K36ac. Another possibility is that transcriptional de-  
340 repression mediated through GCN5 is not dependent on H3.1 variants, but heterochromatin  
341 amplification is. Previous results have shown that expression of ATXR5/6-resistant H3.1A31T  
342 (which partially mimics the N-terminal tail of H3.3 variants) in plants generates very low-level  
343 transcriptional de-repression in heterochromatin (which is supported by GCN5 being active on H3.3  
344 variants), but genomic instability in the H3.1A31T lines is not detected (8). Therefore,  
345 heterochromatin defects in *atxr5/6* mutants could be due to H3.1-independent transcriptional de-  
346 repression mediated by GCN5-catalyzed H3K27ac and H3K36ac, coupled to another H3.1 variant-  
347 specific process that would lead to even higher levels of transcriptional de-repression and  
348 heterochromatin amplification. In this two-step model, transcriptional de-repression in  
349 heterochromatin via GCN5 in the absence of H3K27me1 would be the initial trigger leading to H3.1-  
350 dependent genomic instability. More work will be needed to fully understand the relationship between  
351 H3 variants, transcriptional de-repression, and genomic instability.

## 352 **Materials and Methods**

### 353 **Plant materials**

354 Arabidopsis plants were grown under cool-white fluorescent lights (approximately 100  $\mu\text{mol m}^{-2} \text{s}^{-1}$ )  
355 in long-day conditions (16 h light/8 h dark). The *atxr5/6* double mutant was described previously (3).  
356 *gcn5* (*At3g54610*, SALK\_030913), *ada2b* (*At4g16420*, SALK\_019407), *ada3* (*At4g29790*,  
357 SALK\_042026C), *sgf11* (*At5g58575*, SAIL\_856\_F11), *eny2* (*At3g27100*, SALK\_045015C), *ubp22*  
358 (*At5g10790*, GK-263H06), *chr5* (*At2g13370*, SAIL\_504\_D01) and *chr6* (*At2g25170*, GK-273E06)  
359 are in the Col-0 genetic background and were obtained from the Arabidopsis Biological Resource  
360 Center (Columbus, Ohio). Temperature-optimized CRISPR/Cas9 was used to generate additional  
361 mutant alleles of *GCN5* (in Col-0 and *atxr5/6*) used in this study (23). The *h3.1* quadruple mutant was  
362 described previously (8). Transgenic plants expressing WT H3.1 (*At5g65360*), H3.1S28A, H3.1K9R,  
363 H3.1S28A K9R, H3.1K14R, H3.1S28A K14R, H3.1K18R, H3.1S28A K18R, H3.1K23R, H3.1S28A  
364 K23R, H3.1K36R, H3.1S28A K36R were made by transforming the *h3.1* quadruple mutant  
365 background.

### 366 **Constructs**

367 Cloning of the catalytic fragment of *ATXR6* (a.a. 25-349) and the plant PRC2 complexes for protein  
368 expression and *in vitro* methyltransferase assays was described previously (3, 8). The histone H3.1  
369 gene (*At5g65360*) and its promoter (1167 bp upstream of the start codon) were cloned into pENTR/D-  
370 TOPO (ThermoFisher Scientific, Waltham, MA) and then sub-cloned using Gateway Technology  
371 into the plant binary vectors pB7WG (57). Site-directed mutagenesis to generate the different H3.1  
372 point mutant constructs was performed using QuikChange II XL Site-Directed Mutagenesis Kit  
373 (Agilent Technologies, Santa Clara, CA). The *ADA2b* coding sequence was cloned into pETDuet-1  
374 (Millipore, Burlington, MA) vector using the *SalI* and *NotI* restriction sites, yielding pETDuet-1-  
375 *ADA2b*. The *GCN5* coding sequence was cloned into pETDuet-1-*ADA2b* plasmid using the *EcoRV*  
376 and *PacI* restriction sites, yielding pETDuet-1-*ADA2b-GCN5*. The cloning procedure used to make  
377 the CRISPR construct targeting *GCN5* in Arabidopsis was performed as described previously (58).

## 378 **Protein expression and purification**

379 Expression and purification of the ATXR6 protein and the plant PRC2 complexes CURLY LEAF  
380 and MEDEA has been described previously (3, 8). For the GCN5-ADA2b protein complex, pETDuet-  
381 1-ADA2b-GCN5 was transformed into BL21 (DE3) *E. coli* (Millipore), cultured in LB and induced  
382 to express proteins by adding 1 mM IPTG. Cells were then pelleted by centrifugation, resuspended  
383 in NPI-10 buffer (50mM NaH<sub>2</sub>PO<sub>4</sub>, 300mM NaCl, 10mM Imidazole, pH 8), and lysed by sonification.  
384 After centrifugation to remove cell debris, Ni-NTA agarose (Qiagen, Hilden, Germany) was added to  
385 the supernatant and rotated at 4°C for 2 hours. The Ni-NTA agarose was washed 3 times using NPI-  
386 20 buffer (50mM NaH<sub>2</sub>PO<sub>4</sub>, 300mM NaCl, 20mM imidazole, pH 8), and the protein complex was  
387 eluted in NPI-250 buffer (50mM NaH<sub>2</sub>PO<sub>4</sub>, 300mM NaCl, 250mM imidazole, pH 8). The buffer was  
388 changed to 1×PBS (137 mM NaCl, 10 mM phosphate, 2.7 mM KCl, pH 7.4) containing 10% glycerol  
389 using an Amicon Ultra-0.5 Centrifugal Filter Unit (30kDa cutoff). The proteins were aliquoted, flash-  
390 frozen in liquid nitrogen, and then stored at -80°C.

391 The protocols to generate the H3K27me1 and H3K36me2 methyl-lysine analog-containing histones  
392 and to make the recombinant chromatin used in the *in vitro* histone modification assays (methylation  
393 and acetylation) was described previously (45).

## 394 **Histone lysine methyltransferase (HMT) and acetyltransferase (HAT) assays**

395 The general procedure used to perform the *in vitro* histone modification assays presented in this study  
396 were described in detail in a previous publication (59).

397 For the radioactive HMT assays, 0.5 µg of ATXR6, 1.5 µg of MEA or 1.5 µg of CLF (PRC2)  
398 complexes were incubated with 1 µg of Histone H3 peptides (GenScript, Piscataway, NJ) and 1.5 µCi  
399 of <sup>3</sup>H-SAM (Perkin Elmer, Waltham, MA) in a 25 µl reaction. The histone methyltransferase buffer  
400 contained 50 mM Tris pH 8.0, 2.5 mM MgCl<sub>2</sub> and 4 mM DTT. The methylation reactions were  
401 incubated at 22°C for 2 hours. The samples were pipetted onto Whatman P-81 filter paper and dried  
402 for 15 minutes. The free <sup>3</sup>H-SAM was removed by washing 3 x 30 minutes in 50 mM NaHCO<sub>3</sub> pH  
403 9.0. The filter paper was dried and added to a vial containing Opti-Fluor® O (Perkin Elmer).  
404 Radioactivity on the filter papers was determined using a liquid scintillation counter (Perkin Elmer).



405 For the HAT assays with antibody detection, 1 µg of recombinant nucleosomes and 2 µg of the GCN5-  
406 ADA2b complex were incubated in 50 µl histone acetyltransferase (HAT) buffer (1 mM HEPES pH  
407 7.3, 0.02% BSA) containing 50 mM acetyl co-enzyme A (Acetyl-CoA; Sigma) at 23 °C for 3 hours  
408 (wild type H3.1, H3.1K27M and H3.3 nucleosomes) or 5 hours (H3K27me0, H3K27me1, H3K36me0  
409 and H3K36me3 nucleosomes). The reactions were stopped by adding 4X Laemmli Sample Buffer  
410 (Bio-Rad) and boiling at 95 ° C for 5 min. The samples were resolved by 15% SDS-PAGE gel,  
411 transferred to PVDF membrane, and western blot was performed using anti-H3K9ac (Cell Signaling  
412 Technology, Danvers, MA: 9649), anti-H3K14ac (Active Motif, Carlsbad, CA: 39698), anti-  
413 H3K18ac (Active Motif : 39588), anti-H3K23ac (Active Motif : 39132), anti-H3K27ac (Active Motif:  
414 39135), anti-H3K36ac (Active Motif: 39379) or anti-H3 antibodies (Abcam: ab1791) and a secondary  
415 anti-Rabbit HRP-labeled antibody (Sigma).

416 For the radioactive HAT assays, 1 µg of peptides and 1 µg of GCN5-ADA2 complex were incubated  
417 in 25 µl HAT buffer containing 0.625 µCi <sup>3</sup>H-Acetyl-CoA (PerkinElmer) at 23 ° C for 2 hours.  
418 Reactions were stopped by pipetting onto Whatman P-81 filter paper and activity (cpm) was measured  
419 using a liquid scintillation counter (Perkin Elmer).

## 420 **Chromatin Immunoprecipitation**

421 ChIP was performed as described previously (60), with some modifications. Leaves from three-week-  
422 old plants were fixed in 1% formaldehyde. Immunoprecipitation was performed using protein A  
423 magnetic beads (New England BioLabs, Ipswich, MA). Following the Proteinase K treatment of each  
424 sample, immunoprecipitated DNA was purified using ChIP DNA Clean & Concentrator kit (Zymo  
425 Research, Irvine, CA). 2 µl of Histone H3 antibody (Abcam: ab1791), 2.5 µl of H3K27ac antibody  
426 (Active Motif: 39135), 5 µl of H3K36ac antibody (Active Motif: 39379) or 2.5 µl of H3K36me3  
427 (Abcam: ab9050), was used per immunoprecipitation (750 µl of chromatin solution). For the  
428 H3K27ac and H3K36ac ChIP experiments, ChIP with exogenous genome (ChIP-Rx) was performed  
429 in order to properly normalize the data (40). For each sample, an equal amount of drosophila  
430 chromatin (Active Motif: 53083) was added prior to chromatin shearing.

### 431 **Nuclei DAPI staining**

432 Leaves from four-week-old plants were fixed in 3.7% formaldehyde in cold Tris buffer (10 mM Tris-  
433 HCl pH 7.5, 10 mM NaEDTA, 100 mM NaCl) for 20 minutes. Formaldehyde solution was removed,  
434 and leaves were washed twice for 10 minutes in Tris buffer. The leaves were then finely chopped  
435 with razor blade in 500  $\mu$ l LB01 buffer (15 mM Tris-HCl pH7.5, 2 mM NaEDTA, 0.5 mM spermine-  
436 4HCl, 80 mM KCl, 20 mM NaCl and 0.1% Triton X-100). The lysate was filtered through a 30  $\mu$ m  
437 mesh (Sysmex Partec, Gorlitz, Germany). 5  $\mu$ l of lysate was added to 10  $\mu$ l of sorting buffer (100 mM  
438 Tris-HCl pH 7.5, 50 mM KCl, 2mM MgCl<sub>2</sub>, 0.05% Tween-20 and 5% sucrose) and spread onto a  
439 coverslip until dried. Cold methanol was added onto each coverslip for 3 min, then rehydrated with  
440 TBS-Tx (20 mM Tris pH 7.5, 100 mM NaCl, 0.1% Triton X-100) for 5 min. The coverslips were  
441 mounted onto slides with Vectashield mounting medium DAPI (Vector Laboratories, Burlingame,  
442 CA). Nuclei were imaged on a Nikon Eclipse Ni-E microscope with a 100X CFI PlanApo Lamda  
443 objective (Nikon, Minato City, Tokyo, Japan). Digital images were obtained using an Andor Clara  
444 camera. Z-series optical sections of each nucleus were obtained at 0.3  $\mu$ m steps. Images were  
445 deconvolved by imageJ using the deconvolution plugin.

### 446 **RT-qPCR**

447 Total RNA was extracted from three-week-old leaf tissue using TRIzol (Invitrogen, Carlsbad, CA).  
448 Samples were treated with RQ1 RNase-free DNase (Promega, Madison, WI) at 37°C for 30 min.  
449 SuperScript II Reverse Transcriptase (Invitrogen) was used to produce cDNA from 1  $\mu$ g of total RNA.  
450 Reverse transcription was initiated using oligo dT primers. Quantification of cDNA was done by real-  
451 time PCR using a CFX96 Real-Time PCR Detection System (Bio-Rad, Hercules, CA) with KAPA  
452 SYBR FAST qPCR Master Mix (2 $\times$ ) Kit (Kapa Biosystems, Wilmington, MA). Each primer pair was  
453 assessed for efficiency of amplification. Relative quantities were determined by the C<sub>t</sub> method (61).  
454 Actin was used as the normalizer. At least three biological samples were used for each experiment.

### 455 **Flow cytometry**

456 Rosette leaves from three-week-old plants were finely chopped in 0.5 ml Galbraith buffer (45 mM  
457 MgCl<sub>2</sub>, 20 mM MOPS, 30 mM sodium citrate, 0.1% Triton X-100, 40  $\mu$ g/ $\mu$ l RNase A) using a razor

458 blade. The lysate was filtered through a 30  $\mu\text{m}$  mesh (Sysmex Partec). Propidium iodide (Sigma, St.  
459 Louis, MO) was added to each sample to a concentration of 20  $\mu\text{g}/\text{ml}$  and vortexed for 3 seconds.  
460 Each sample was analyzed using a BD FACS LSR Fortessa X20 (Becton Dickinson, Franklin Lakes,  
461 NJ). Quantification (nuclei counts and robust CV values) was performed using Flowjo 10.0.6 (Tree  
462 Star, Ashland, Oregon).

### 463 **Next-generation sequencing library preparation**

464 RNA samples were prepared from three-week old leaf tissue using the RNeasy Plant Mini Kit  
465 (Qiagen). RNA and ChIP sequencing libraries were prepared at the Yale Center for Genome Analysis  
466 (YCGA). RNA samples were quantified and checked for quality using the Agilent 2100 Bioanalyzer  
467 Nano RNA Assay. Library preparation was performed using Illumina's TruSeq Stranded Total RNA  
468 with Ribo-Zero Plant in which samples were normalized with a total RNA input of 1  $\mu\text{g}$  and library  
469 amplification with 8 PCR cycles. ChIP library preparation was performed using TruSeq Library Prep  
470 Kit (Illumina, San Diego, CA). Libraries were validated using Agilent Bioanalyzer 2100 High  
471 sensitivity DNA assay and quantified using the KAPA Library Quantification Kit for Illumina®  
472 Platforms kit. Sequencing was done on an Illumina NovaSeq 6000 using the S4 XP workflow.

### 473 **RNA-seq processing and analysis**

474 Two independent biological replicates for Col, *atx5/6*, *gcn5* and *atx5/6 gcn5* were sequenced.  
475 Paired-end reads were filtered and trimmed using BBTools (version 38.79) (62). Reads with quality  
476 inferior to 20 were removed. The resulting data sets were aligned against the *Arabidopsis* genome  
477 (TAIR10) using STAR (version 2.7.2a) allowing 2 mismatches (--outFilterMismatchNmax 2) (63).  
478 Consistency between biological replicates was confirmed by Pearson correlation using deepTools2  
479 (Supplementary Figure 9) (64). Protein-coding genes and transposable elements (TE) were defined  
480 as described in the TAIR10 annotation gff3 file. The program featureCounts (version 1.6.4) (65) was  
481 used to count the paired-end fragments overlapping with the annotated protein-coding genes and TEs.  
482 Differential expression analysis of protein-coding genes was performed using DESeq2 version 1.26  
483 (66) on raw read counts to obtain normalized fold changes (FC) and *Padj*-values for each gene. Genes  
484 were considered to be differentially expressed only if they showed a  $\log_2\text{FC} > 1$  and a *Padj*-values  $<$

485 0.05. TPM (transcripts per million) values were calculated for TEs. To define TEs as up-regulated in  
486 the *atxr5/6* mutant, they must show 2-fold up-regulation as compared to Col in both biological  
487 replicates and have a value of TPM > 5. The heatmap was drawn with R program (version 3.6.2) (67).

#### 488 **ChIP-seq processing and analysis**

489 Two independent biological replicates for Col, *atxr5/6*, *gcn5* and *atxr5/6 gcn5* were sequenced. In  
490 order to properly compare H3K27ac and H3K36ac levels between each genotype, we performed ChIP  
491 with reference exogenous genome (ChIP-Rx) (40) using equal amounts of drosophila chromatin in  
492 each sample as reference. Paired-end reads were filtered and trimmed using BBTools (62). Reads  
493 with quality inferior to 20 were removed. Data sets were aligned against combined genomes of  
494 *Arabidopsis thaliana* (TAIR10) and *Drosophila melanogaster* (dm6) using bowtie2 (68) with default  
495 parameters. Duplicate reads were removed using Picard toolkit (69) (MarkesDuplicates with  
496 *REMOVE\_DUPLICATES=true*). Consistency between biological replicates was confirmed by  
497 Pearson correlation using deepTools2 (Supplementary Figure 10) (64). To calculate the Rx scaling  
498 factor of each biological replicate, Drosophila-derived IP read counts were normalized according to  
499 the number of input reads. Spike-in normalization was performed as previously described (70). The  
500 Rx factors are presented in Supplementary Table 4. We generated bedgraph files with a bin size of  
501 10 bp using deepTools. The bedgraph files were then scaled by adjusting the number of reads in each  
502 bin with the Rx factors and therefore generating reference-adjusted reads per million (RRPM).  
503 H3K27ac and H3K36ac enriched regions were identified by computing the differential between each  
504 bin ( $\pm$  1kb) to define local maxima.

505 The number of reads corresponding to euchromatic regions was much higher than the ones from  
506 heterochromatic regions. To best determine the heterochromatic enrichment of H3K27ac in each  
507 genotype of interest, we avoided the “noise” from the euchromatic reads by first defining  
508 heterochromatic regions and extracting the corresponding reads from each genotype. We defined the  
509 heterochromatic regions based on the chromatin states proposed by Sequeira-Mendes *et al.*, 2014  
510 (43). We attributed the value of the state number (1 to 9) for each bin of the Sequeira-Mendes *et al.*  
511 annotation, and averaged them on 100 kb windows. Only the 100 kb windows with a score superior  
512 to 7 were considered as heterochromatic regions (Supplementary Table 2). We then generated a bam

513 file with the reads corresponding to the defined heterochromatic regions. We identified  
514 heterochromatic H3K27ac and H3K36ac enriched regions by calculating the log<sub>2</sub> ratio between  
515 H3K27ac or H3K36ac IP and H3 input using the heterochromatin bam file. The enriched regions  
516 were defined with the following criteria: log<sub>2</sub> (IP/H3) > 0.3. To compare the H3K27ac and H3K36ac  
517 enriched regions between Col and our mutant genotypes, we computed log<sub>2</sub> (mutant/Col), using the  
518 Rx factor normalized bedgraph file. We considered the levels of H3K27ac and H3K36ac to be  
519 differential between genotypes when log<sub>2</sub> (mutant/Col) > 0.8. These regions needed to be detected in  
520 both replicate in order to be considered.

#### 521 **Primers**

522 All primers used in this study are listed in Supplemental Table 7.

#### 523 **Data availability**

524 Sequencing data are available at the Gene Expression Omnibus (GEO) under accession code  
525 GSE146126.

## 526 **Figure Legends**

### 527 **Main Figures**

528 **Figure 1. A mutation in *GCN5* suppresses transcriptional de-repression and heterochromatin**  
529 **amplification associated with H3.1K27me1 depletion.** (A) Flow cytometry profiles of Col, *atxr5/6*,  
530 *gcn5* and *atxr5/6 gcn5* nuclei stained with propidium iodide (PI) with 2000 gated events. The numbers  
531 below the peaks indicate ploidy levels of the nuclei. The numbers above the 16C peaks indicate the  
532 robust coefficient of variation (CV). (B) Leaf interphase nuclei of Col, *atxr5/6*, *gcn5* and *atxr5/6 gcn5*  
533 stained with DAPI. (C) Heat map showing the relative expression levels of *atxr5/6*-induced TEs  
534 (Supplemental Table 1) as measured by TPM (transcripts per million) in Col, *atxr5/6*, *gcn5* and  
535 *atxr5/6 gcn5*. (D) Euler diagrams showing the upregulated and downregulated genes (2-fold change)  
536 in *atxr5/6*, *gcn5* and *atxr5/6 gcn5* in comparison to Col plants ( $P_{adj} < 0.05$ ).

537 **Figure 2. *GCN5* requires *ADA2b* to induce heterochromatic defects in *atxr5/6* mutants.** (A)  
538 Proposed subunits of the Arabidopsis SAGA complex. HAT: histone acetylation module; DUB:  
539 deubiquitination module; SPT: recruiting module; TAF; coactivator architecture module. (B) Flow  
540 cytometry profiles of Col, *atxr5/6*, *ada2b*, *atxr5/6 ada2b*, *ada3*, and *atxr5/6 ada3*. (C and D) RT-  
541 qPCR analyses of *BRCAL* (C) and the repetitive element *TSI* (D) in Col, *atxr5/6*, *ada2b* and *atxr5/6*  
542 *ada2b*. Data represent the mean of three biological replicates and error bars indicate the standard error  
543 of the mean (SEM). Unpaired t-test: \*  $p < 0.01$ , \*\*  $p < 0.001$ . (E) Flow cytometry profiles of Col,  
544 *atxr5/6*, *chr5*, *atxr5/6 chr5*, *chr6*, and *atxr5/6 chr6*.

545 **Figure 3. Arabidopsis *GCN5* acetylates H3.1K27 and induces the heterochromatic defects**  
546 **associated with *atxr5/6*.** (A) *In vitro* HAT assays with the *GCN5-ADA2b* complex and H3.1 and  
547 H3.3 nucleosomes using anti-H3K9ac, anti-H3K14ac, anti-H3K18ac, anti-H3K23ac, anti-H3K27ac,  
548 anti-H3K36ac and anti-H3 antibodies. (B) Western blot of H3.1K27ac and H3.3K27ac peptides with  
549 H3K27ac antibody. (C) *In vitro* HAT assay with the *GCN5-ADA2b* complex and H3K27M  
550 nucleosomes. (D) *In vitro* HAT assays with the *GCN5-ADA2b* complex and H3K27me0 and  
551 H3K27me1 nucleosomes using anti-H3K27ac, anti-H3 antibodies (E and F) RT-qPCR for the  
552 heterochromatic transcriptional reactivation marker *TSI* (E) and the genome stability marker *BRCAL*

553 (F) in Col, *atxr5/6* and first-generation transformed (T1) plants expressing WT H3.1 or H3.1K27Q.  
554 Ten independent T1 plants were used in the experiments. Unpaired t-test: \*  $p < 0.001$ .

555 **Figure 4. Heterochromatin amplification in the absence of H3.1K27me1 requires H3.1K36** (A)  
556 *In vitro* histone lysine methylation assays using H3.1 and H3.1S28A peptide substrates and ATXR6.  
557 The average of three experiments and SEM are shown. CPM; counts per minute (B) Robust CV values  
558 for 16N nuclei obtained by flow cytometry analysis. For Col and *atxr5/6*, each dot represents an  
559 independent biological replicate. For the H3.1 replacement lines, each dot represents one T1 plant.  
560 Horizontal bars indicate the mean. Unpaired t-test: \*  $p < 0.0001$  and n.s. = not significantly different.  
561 (C and D) RT-qPCR analyses of *BRCAL* (C) and the repetitive element *TSI* (D) in Col, *atxr5/6* and  
562 H3.1 replacement lines. For Col and *atxr5/6*, each dot represents an independent biological replicate.  
563 For the H3.1 lines, each dot represents one T1 plant. Horizontal bars indicate the mean. Unpaired t-  
564 test: \*  $p < 0.01$ , \*\*  $p < 0.0005$  (E) Flow cytometry analyses showing robust CV values for 16N nuclei.  
565 For the *SDG24-OX* lines, each dot represents one T1 plant. Horizontal bars indicate the mean.  
566 Unpaired t-test: \*  $p < 0.001$ . (F) H3K36me3 ChIP-qPCR at *Ta3*, *At1g38250*, *At4g06566* and *Actin7*.  
567 For Col and *atxr5/6*, each dot represents an independent biological replicate. For the *SDG24-OX*  
568 lines, each dot represents one T1 plant. Bars indicate the mean. Error bars indicate SEM.

569 **Figure 5. Mutations in *atxr5/6* lead to an increase in H3K27ac and H3K36ac in**  
570 **heterochromatin.** (A) Normalized average distribution of H3K27ac and H3K36ac over protein  
571 coding genes for Col, *atxr5/6*, *gcn5* and *atxr5/6 gcn5* in reference-adjusted reads per million (RRPM).  
572 TSS, transcription start site; TES, transcription end site. (B) Normalized average distribution and  
573 heatmap of H3K27ac and H3K36ac normalized reads surrounding the H3K27ac/H3K36ac enriched  
574 heterochromatic regions in *atxr5/6* compared to Col. (C) Genome browser snapshot showing  
575 normalized H3K27ac and H3K36ac ChIP-seq data over a region of chromosome 5 that includes TE  
576 genes *At5g29591* and *At5g29602*. The y-axis unit is RRPM. (D) Heatmap showing the RNA-seq reads  
577 mapping to the region 3 kb around the center of H3K27ac/H3K36ac peaks as measured by RPKM  
578 (reads per kilobase million) in Col, *atxr5/6*, *gcn5* and *atxr5/6 gcn5*.

579 **Figure 6. H3K36 acetylation by the GCN5-ADA2b complex is regulated by H3K27me1.** (A) *In*  
580 *vitro* HAT assays with the GCN5-ADA2b complex and H3K27me0 and H3K27me1 nucleosomes.

581 (B) Data from three technical replicates of HAT assays with the GCN5-ADA2b complex and  
582 H3K27me0 and H3K27me1 nucleosomes. Unpaired t-test: \*  $p < 0.05$ , and n.s. = not significantly  
583 different. (C) *In vitro* HAT assays with the GCN5-ADA2b complex and H3K36me0 and H3K36me3  
584 nucleosomes. D) Model depicting the role of H3.1K27me1 in blocking GCN5-mediated acetylation  
585 of H3.1K27ac and H3.1K36ac.

## 586 **Supplemental Figures**

### 587 **Supplemental Figure 1. Effect of *GCN5* on genome stability and transcriptional de-repression.**

588 (A) Gene structure for *GCN5*. Exons are highlighted as black boxes. The location of the mutations in  
589 the *gcn5* alleles used in this study are shown. (B) Quantification of chromocenter appearance. Shown  
590 is the percentage of nuclei that are fully condensed (green), hollow spheres characteristic of the  
591 *atxr5/6* mutant plants (blue) and irregularly/partially decondensed (grey). At least 25 nuclei for 3  
592 biological replicates of each genotype were assessed. Error bars indicate SEM (C) CRISPR-induced  
593 mutations of *GCN5* in Col and *atxr5/6* backgrounds. Mutations (red) and PAM motif (blue) are  
594 shown. (D) Flow cytometry profiles of Col, *atxr5/6* and the CRISPR-induced knockout allele of *gcn5*  
595 in Col and the *atxr5/6* mutant background. The numbers below the peaks indicate ploidy levels of the  
596 nuclei. The numbers above the 16C peaks indicate the robust CV. (E) Gene expression levels in our  
597 RNA-seq experiments for the known suppressors of transcriptional de-repression in *atxr5/6*.

### 598 **Supplemental Figure 2. Role of SAGA-related proteins in transcriptional de-repression and**

599 **genome stability.** (A) Growth phenotype of *gcn5* and *ada2b* single mutants and in combination with  
600 *atxr5/6*. (B and C) RT-qPCR for the genome stability marker *BRCAL* (B) and the heterochromatic  
601 transcriptional reactivation marker *TSI* (C). The average of three biological replicates and SEM are  
602 shown. (D) Flow cytometry profiles of the mutant alleles of genes predicted to code for subunits of  
603 SAGA in plants. The Robust CV value calculated for the 16C peak on each plot is used as a measure  
604 of heterochromatin amplification.



605 **Supplemental Figure 3. Purification of the GCN5-ADA2b complex.** Coomassie-stained gel  
606 showing GCN5-ADA2b protein expression either pre- or post-induction in *E. coli*, or after affinity  
607 purification (eluate).

608 **Supplemental Figure 4. *In vitro* histone modification assays.** (A) *In vitro* histone lysine  
609 methylation assays at H3.1K27 using peptide substrates, ATXR6 and plant PRC2 complexes. The  
610 average of three experiments and SEM are shown. (B) *In vitro* HAT assays using H3.1 peptides.  
611 Lysine (K) to arginine (R) mutations were introduced (blue) on the peptides at other potential targets  
612 (H3.1K18, H3.1K23, H3.1K36 and H3.1K37) of GCN5-ADA2b, so that the acetylation signal could  
613 be specifically measured at H3.1K27 (red). H3.1S28A is shown in green. The average of three  
614 experiments and SEM are shown.

615 **Supplemental Figure 5. Growth and developmental phenotypes of T1 plants expressing**  
616 **different H3.1 transgenes.**

617 **Supplemental Figure 6. Robust CV values for 16N nuclei obtained by flow cytometry analyses.**  
618 For Col and *atxr5/6*, each dot represents an independent biological replicate. For overexpression lines,  
619 each dot represents one first-generation transformed (T1) plant.

620 **Supplemental Figure 7. Average distribution of H3K27ac and H3K36ac over protein- coding**  
621 **genes grouped by their expression levels.** TSS, transcription start site; TES, transcription end site.

622 **Supplemental Figure 8. Validation of ChIP-seq and RNA-seq analyses.** Genome browser  
623 snapshots at different TEs showing H3K27ac enrichment in *atxr5/6*, ChIP-qPCR confirmation of  
624 H3K27ac enrichment and expression levels for these TEs. *At4g06566* and *At1g38250* were detected  
625 as de-repressed in *atxr5/6* by RNA-seq, but not *At1g36040* or *At5g29602*. Data represents the mean  
626 of three biological replicates and error bars indicate SEM. Unpaired t-test: \*  $p < 0.05$ , \*\*  $p < 0.01$  and  
627 \*\*\*  $p < 0.001$ .

628 **Supplemental Figure 9. Scatterplots and Pearson correlation coefficients for RNA-seq**  
629 **replicates of Col, *atxr5/6*, *gcn5* and *atxr5/6 gcn5*.**

630 **Supplemental Figure 10. Scatterplots and Pearson correlation coefficients for H3K27ac and**  
631 **H3K36ac ChIP-seq replicates of Col, *atxr5/6*, *gcn5* and *atxr5/6 gcn5*.**

632 **Supplementary Tables**

633 **Supplemental Table 1. TEs de-repressed in *atxr5/6*.** TEs highlighted in blue are detected only at  
634 the highest sequencing depth. TEs in green are detected only at the lowest sequencing depth. TEs  
635 highlighted in gray are detected at the highest and lowest sequencing depths.

636 **Supplemental Table 2. Misregulated genes in *atxr5/6*, *gcn5* and *atxr5/6 gcn5*.**

637 **Supplemental Table 3. Regions of Arabidopsis genome defined as heterochromatin.**

638 **Supplemental Table 4. Heterochromatic regions enriched in H3K27ac and H3K36ac in *atxr5/6*.**

639 **Supplemental Table 5. TEs that are de-repressed and overlap with heterochromatic regions**  
640 **enriched in H3K27ac and H3K36ac in *atxr5/6*.**

641 **Supplemental Table 6. Rx factors for Col, *atxr5/6*, *gcn5* and *atxr5/6 gcn5* replicates.**

642 **Supplemental Table 7. Cloning and PCR primers.**

## 643 **Author Contributions**

644 Y.J., J.D., C.L. and A.P. designed the experiments. Y.J. wrote the paper with contributions from J.D.,  
645 C.L. and A.P. All *in vitro* assays were performed by J.D. C.L. performed the ChIP experiments. A.P.  
646 did the bioinformatics analyses of all ChIP-seq experiments. A.P. and V.J. did RNA-seq analyses.  
647 Microscopy was done by C.L. Flow cytometry analyses were performed by C.L., B.M, G.V and J.M.  
648 RNA extractions and RT-qPCR were done by C.L. and J.D and G.V. Crosses were done by G.V. and  
649 B.M. Genotyping and plant transformations were performed by G.V., J.M., C.L., and B.M. G.V. made  
650 the CRISPR/Cas9 mutants. K.M.W. and P.V. made the modified and unmodified nucleosomes used  
651 in the *in vitro* assays.

## 652 **Acknowledgments**

653 We thank members of our lab for discussions and advice during the course of this work. We want to  
654 acknowledge Christopher Bolick and his staff at Yale for help with plant growth and maintenance.  
655 We also thank Jean-François Couture (University of Ottawa) for sending the K27M nucleosomes  
656 used in this study, and Kenneth Nelson (Yale University) for technical help with flow cytometry. This  
657 project was supported by grant #R35GM128661 from the National Institutes of Health to Y.J. B.M.  
658 was supported by a Yale University Brown Fellowship. V.J. is supported by the Fonds de Recherche  
659 du Québec-Nature et Technologies (FRQNT) [272565]. Work in the Voigt lab is supported by the  
660 Wellcome Trust ([104175/Z/14/Z], Sir Henry Dale Fellowship to P.V.) and the European Research  
661 Council (ERC) under the European Union's Horizon 2020 research and innovation programme (ERC-  
662 STG grant agreement No. 639253). The Wellcome Centre for Cell Biology is supported by core  
663 funding from the Wellcome Trust [203149]. We are grateful to the Edinburgh Protein Production  
664 Facility (EPPF) for their support. The EPPF was supported by the Wellcome Trust through a Multi-  
665 User Equipment grant [101527/Z/13/Z]. The authors declare that they have no competing interests.

## 666 **Competing Interests**

667 The authors declare that they have no competing interests.

## References

1. Chen JM, Cooper DN, Ferec C, Kehrer-Sawatzki H, Patrinos GP. Genomic rearrangements in inherited disease and cancer. *Semin Cancer Biol.* 2010;20(4):222-33.
2. Weinert T, Kaochar S, Jones H, Paek A, Clark AJ. The replication fork's five degrees of freedom, their failure and genome rearrangements. *Curr Opin Cell Biol.* 2009;21(6):778-84.
3. Jacob Y, Feng S, LeBlanc CA, Bernatavichute YV, Stroud H, Cokus S, et al. ATXR5 and ATXR6 are H3K27 monomethyltransferases required for chromatin structure and gene silencing. *Nat Struct Mol Biol.* 2009;16(7):763-8.
4. Stroud H, Hale CJ, Feng S, Caro E, Jacob Y, Michaels SD, et al. DNA methyltransferases are required to induce heterochromatic re-replication in Arabidopsis. *PLoS Genet.* 2012;8(7):e1002808.
5. Jacob Y, Stroud H, Leblanc C, Feng S, Zhuo L, Caro E, et al. Regulation of heterochromatic DNA replication by histone H3 lysine 27 methyltransferases. *Nature.* 2010;466(7309):987-91.
6. Davarinejad H, Joshi M, Ait-Hamou N, Munro K, Couture JF. ATXR5/6 Forms Alternative Protein Complexes with PCNA and the Nucleosome Core Particle. *J Mol Biol.* 2019;431(7):1370-9.
7. Raynaud C, Sozzani R, Glab N, Domenichini S, Perennes C, Cella R, et al. Two cell-cycle regulated SET-domain proteins interact with proliferating cell nuclear antigen (PCNA) in Arabidopsis. *Plant J.* 2006;47(3):395-407.
8. Jacob Y, Bergamin E, Donoghue MT, Mongeon V, LeBlanc C, Voigt P, et al. Selective methylation of histone H3 variant H3.1 regulates heterochromatin replication. *Science.* 2014;343(6176):1249-53.
9. Hale CJ, Potok ME, Lopez J, Do T, Liu A, Gallego-Bartolome J, et al. Identification of Multiple Proteins Coupling Transcriptional Gene Silencing to Genome Stability in Arabidopsis thaliana. *PLoS Genet.* 2016;12(6):e1006092.
10. Musselman CA, Lalonde ME, Cote J, Kutateladze TG. Perceiving the epigenetic landscape through histone readers. *Nat Struct Mol Biol.* 2012;19(12):1218-27.
11. Fischle W, Wang Y, Jacobs SA, Kim Y, Allis CD, Khorasanizadeh S. Molecular basis for the discrimination of repressive methyl-lysine marks in histone H3 by Polycomb and HP1 chromodomains. *Genes Dev.* 2003;17(15):1870-81.
12. Huang Y, Jiang L, Liu BY, Tan CF, Chen DH, Shen WH, et al. Evolution and conservation of polycomb repressive complex 1 core components and putative associated factors in the green lineage. *BMC Genomics.* 2019;20(1):533.
13. Ferrari KJ, Scelfo A, Jammula S, Cuomo A, Barozzi I, Stutzer A, et al. Polycomb-dependent H3K27me1 and H3K27me2 regulate active transcription and enhancer fidelity. *Mol Cell.* 2014;53(1):49-62.

14. Johnson L, Mollah S, Garcia BA, Muratore TL, Shabanowitz J, Hunt DF, et al. Mass spectrometry analysis of Arabidopsis histone H3 reveals distinct combinations of post-translational modifications. *Nucleic Acids Res.* 2004;32(22):6511-8.
15. Pasini D, Malatesta M, Jung HR, Walfridsson J, Willer A, Olsson L, et al. Characterization of an antagonistic switch between histone H3 lysine 27 methylation and acetylation in the transcriptional regulation of Polycomb group target genes. *Nucleic Acids Res.* 2010;38(15):4958-69.
16. Tie F, Banerjee R, Stratton CA, Prasad-Sinha J, Stepanik V, Zlobin A, et al. CBP-mediated acetylation of histone H3 lysine 27 antagonizes Drosophila Polycomb silencing. *Development.* 2009;136(18):3131-41.
17. Chen C, Li C, Wang Y, Renaud J, Tian G, Kambhampati S, et al. Cytosolic acetyl-CoA promotes histone acetylation predominantly at H3K27 in Arabidopsis. *Nat Plants.* 2017;3(10):814-24.
18. Cieniewicz AM, Moreland L, Ringel AE, Mackintosh SG, Raman A, Gilbert TM, et al. The bromodomain of Gcn5 regulates site specificity of lysine acetylation on histone H3. *Mol Cell Proteomics.* 2014;13(11):2896-910.
19. Kuo MH, Brownell JE, Sobel RE, Ranalli TA, Cook RG, Edmondson DG, et al. Transcription-linked acetylation by Gcn5p of histones H3 and H4 at specific lysines. *Nature.* 1996;383(6597):269-72.
20. Kuo YM, Andrews AJ. Quantitating the specificity and selectivity of Gcn5-mediated acetylation of histone H3. *PLoS One.* 2013;8(2):e54896.
21. Suka N, Suka Y, Carmen AA, Wu J, Grunstein M. Highly specific antibodies determine histone acetylation site usage in yeast heterochromatin and euchromatin. *Mol Cell.* 2001;8(2):473-9.
22. Pandey R, Muller A, Napoli CA, Selinger DA, Pikaard CS, Richards EJ, et al. Analysis of histone acetyltransferase and histone deacetylase families of Arabidopsis thaliana suggests functional diversification of chromatin modification among multicellular eukaryotes. *Nucleic Acids Res.* 2002;30(23):5036-55.
23. LeBlanc C, Zhang F, Mendez J, Lozano Y, Chatpar K, Irish VF, et al. Increased efficiency of targeted mutagenesis by CRISPR/Cas9 in plants using heat stress. *Plant J.* 2018;93(2):377-86.
24. Ma Z, Castillo-Gonzalez C, Wang Z, Sun D, Hu X, Shen X, et al. Arabidopsis Serrate Coordinates Histone Methyltransferases ATXR5/6 and RNA Processing Factor RDR6 to Regulate Transposon Expression. *Dev Cell.* 2018;45(6):769-84 e6.
25. Spedale G, Timmers HT, Pijnappel WW. ATAC-king the complexity of SAGA during evolution. *Genes Dev.* 2012;26(6):527-41.

26. Moraga F, Aquea F. Composition of the SAGA complex in plants and its role in controlling gene expression in response to abiotic stresses. *Front Plant Sci.* 2015;6:865.
27. Vlachonasis KE, Thomashow MF, Triezenberg SJ. Disruption mutations of ADA2b and GCN5 transcriptional adaptor genes dramatically affect Arabidopsis growth, development, and gene expression. *Plant Cell.* 2003;15(3):626-38.
28. Prakash R, Zhang Y, Feng W, Jasin M. Homologous recombination and human health: the roles of BRCA1, BRCA2, and associated proteins. *Cold Spring Harb Perspect Biol.* 2015;7(4):a016600.
29. Savage KI, Harkin DP. BRCA1, a 'complex' protein involved in the maintenance of genomic stability. *Febs J.* 2015;282(4):630-46.
30. Srivastava R, Rai KM, Pandey B, Singh SP, Sawant SV. Spt-Ada-Gcn5-Acetyltransferase (SAGA) Complex in Plants: Genome Wide Identification, Evolutionary Conservation and Functional Determination. *PLoS One.* 2015;10(8):e0134709.
31. Pfab A, Bruckmann A, Nazet J, Merkl R, Grasser KD. The Adaptor Protein ENY2 Is a Component of the Deubiquitination Module of the Arabidopsis SAGA Transcriptional Co-activator Complex but not of the TREX-2 Complex. *J Mol Biol.* 2018;430(10):1479-94.
32. Earley KW, Shook MS, Brower-Toland B, Hicks L, Pikaard CS. In vitro specificities of Arabidopsis co-activator histone acetyltransferases: implications for histone hyperacetylation in gene activation. *Plant J.* 2007;52(4):615-26.
33. Megee PC, Morgan BA, Mittman BA, Smith MM. Genetic analysis of histone H4: essential role of lysines subject to reversible acetylation. *Science.* 1990;247(4944):841-5.
34. Wang X, Hayes JJ. Acetylation mimics within individual core histone tail domains indicate distinct roles in regulating the stability of higher-order chromatin structure. *Mol Cell Biol.* 2008;28(1):227-36.
35. Zhang W, Bone JR, Edmondson DG, Turner BM, Roth SY. Essential and redundant functions of histone acetylation revealed by mutation of target lysines and loss of the Gcn5p acetyltransferase. *Embo J.* 1998;17(11):3155-67.
36. Bergamin E, Sarvan S, Malette J, Eram MS, Yeung S, Mongeon V, et al. Molecular basis for the methylation specificity of ATXR5 for histone H3. *Nucleic Acids Res.* 2017;45(11):6375-87.
37. Baumbusch LO, Thorstensen T, Krauss V, Fischer A, Naumann K, Assalkhou R, et al. The Arabidopsis thaliana genome contains at least 29 active genes encoding SET domain proteins that can be assigned to four evolutionarily conserved classes. *Nucleic Acids Res.* 2001;29(21):4319-33.

38. Springer NM, Napoli CA, Selinger DA, Pandey R, Cone KC, Chandler VL, et al. Comparative analysis of SET domain proteins in maize and Arabidopsis reveals multiple duplications preceding the divergence of monocots and dicots. *Plant Physiol.* 2003;132(2):907-25.
39. Dillon SC, Zhang X, Trievel RC, Cheng X. The SET-domain protein superfamily: protein lysine methyltransferases. *Genome Biol.* 2005;6(8):227.
40. Orlando DA, Chen MW, Brown VE, Solanki S, Choi YJ, Olson ER, et al. Quantitative ChIP-Seq normalization reveals global modulation of the epigenome. *Cell Rep.* 2014;9(3):1163-70.
41. Mahrez W, Arellano MS, Moreno-Romero J, Nakamura M, Shu H, Nanni P, et al. H3K36ac Is an Evolutionary Conserved Plant Histone Modification That Marks Active Genes. *Plant Physiol.* 2016;170(3):1566-77.
42. Zhang W, Garcia N, Feng Y, Zhao H, Messing J. Genome-wide histone acetylation correlates with active transcription in maize. *Genomics.* 2015;106(4):214-20.
43. Sequeira-Mendes J, Araguez I, Peiro R, Mendez-Giraldez R, Zhang X, Jacobsen SE, et al. The Functional Topography of the Arabidopsis Genome Is Organized in a Reduced Number of Linear Motifs of Chromatin States. *Plant Cell.* 2014;26(6):2351-66.
44. Schmitges FW, Prusty AB, Faty M, Stutzer A, Lingaraju GM, Aiwazian J, et al. Histone methylation by PRC2 is inhibited by active chromatin marks. *Mol Cell.* 2011;42(3):330-41.
45. Voigt P, LeRoy G, Drury WJ, 3rd, Zee BM, Son J, Beck DB, et al. Asymmetrically modified nucleosomes. *Cell.* 2012;151(1):181-93.
46. Yuan W, Xu M, Huang C, Liu N, Chen S, Zhu B. H3K36 methylation antagonizes PRC2-mediated H3K27 methylation. *J Biol Chem.* 2011;286(10):7983-9.
47. Jung HR, Pasini D, Helin K, Jensen ON. Quantitative mass spectrometry of histones H3.2 and H3.3 in Suz12-deficient mouse embryonic stem cells reveals distinct, dynamic post-translational modifications at Lys-27 and Lys-36. *Mol Cell Proteomics.* 2010;9(5):838-50.
48. Peters AH, Kubicek S, Mechtler K, O'Sullivan RJ, Derijck AA, Perez-Burgos L, et al. Partitioning and plasticity of repressive histone methylation states in mammalian chromatin. *Mol Cell.* 2003;12(6):1577-89.
49. Li C, Xu J, Li J, Li Q, Yang H. Involvement of Arabidopsis HAC family genes in pleiotropic developmental processes. *Plant Signal Behav.* 2014;9(3):e28173.
50. Creighton MP, Cheng AW, Welstead GG, Kooistra T, Carey BW, Steine EJ, et al. Histone H3K27ac separates active from poised enhancers and predicts developmental state. *Proc Natl Acad Sci U S A.* 2010;107(50):21931-6.

51. Rada-Iglesias A, Bajpai R, Swigut T, Brugmann SA, Flynn RA, Wysocka J. A unique chromatin signature uncovers early developmental enhancers in humans. *Nature*. 2011;470(7333):279-83.
52. Zhang T, Zhang Z, Dong Q, Xiong J, Zhu B. Histone H3K27 acetylation is dispensable for enhancer activity in mouse embryonic stem cells. *Genome Biol*. 2020;21(1):45.
53. Du Z, Li H, Wei Q, Zhao X, Wang C, Zhu Q, et al. Genome-wide analysis of histone modifications: H3K4me2, H3K4me3, H3K9ac, and H3K27ac in *Oryza sativa* L. Japonica. *Mol Plant*. 2013;6(5):1463-72.
54. Yan W, Chen D, Schumacher J, Durantini D, Engelhorn J, Chen M, et al. Dynamic control of enhancer activity drives stage-specific gene expression during flower morphogenesis. *Nat Commun*. 2019;10(1):1705.
55. Wang Z, Zang C, Rosenfeld JA, Schones DE, Barski A, Cuddapah S, et al. Combinatorial patterns of histone acetylations and methylations in the human genome. *Nat Genet*. 2008;40(7):897-903.
56. Clements A, Poux AN, Lo WS, Pillus L, Berger SL, Marmorstein R. Structural basis for histone and phosphohistone binding by the GCN5 histone acetyltransferase. *Mol Cell*. 2003;12(2):461-73.
57. Karimi M, Inze D, Depicker A. GATEWAY vectors for *Agrobacterium*-mediated plant transformation. *Trends Plant Sci*. 2002;7(5):193-5.
58. Yan L, Wei S, Wu Y, Hu R, Li H, Yang W, et al. High-Efficiency Genome Editing in *Arabidopsis* Using YAO Promoter-Driven CRISPR/Cas9 System. *Mol Plant*. 2015;8(12):1820-3.
59. Jacob Y, Voigt P. In Vitro Assays to Measure Histone Methyltransferase Activity Using Different Chromatin Substrates. *Methods Mol Biol*. 2018;1675:345-60.
60. Villar CB, Kohler C. Plant chromatin immunoprecipitation. *Methods Mol Biol*. 2010;655:401-11.
61. Livak KJ, Schmittgen TD. Analysis of relative gene expression data using real-time quantitative PCR and the  $2^{-\Delta\Delta C(T)}$  Method. *Methods*. 2001;25(4):402-8.
62. Bushnell B, Rood J, Singer E. BBMerge - Accurate paired shotgun read merging via overlap. *PLoS One*. 2017;12(10):e0185056.
63. Dobin A, Davis CA, Schlesinger F, Drenkow J, Zaleski C, Jha S, et al. STAR: ultrafast universal RNA-seq aligner. *Bioinformatics*. 2013;29(1):15-21.
64. Ramirez F, Ryan DP, Gruning B, Bhardwaj V, Kilpert F, Richter AS, et al. deepTools2: a next generation web server for deep-sequencing data analysis. *Nucleic Acids Res*. 2016;44(W1):W160-5.



65. Liao Y, Smyth GK, Shi W. featureCounts: an efficient general purpose program for assigning sequence reads to genomic features. *Bioinformatics*. 2014;30(7):923-30.
66. Love MI, Huber W, Anders S. Moderated estimation of fold change and dispersion for RNA-seq data with DESeq2. *Genome Biol*. 2014;15(12):550.
67. Team RC. R: A language and environment for statistical computing. R Foundation for Statistical Computing, Vienna, Austria. 2018.
68. Langmead B, Salzberg SL. Fast gapped-read alignment with Bowtie 2. *Nat Methods*. 2012;9(4):357-9.
69. toolkit. BIP. doi:<http://broadinstitute.github.io/picard/>. 2019.
70. Nassrallah A, Rougee M, Bourbousse C, Drevensek S, Fonseca S, Iniesto E, et al. DET1-mediated degradation of a SAGA-like deubiquitination module controls H2Bub homeostasis. *Elife*. 2018;7.

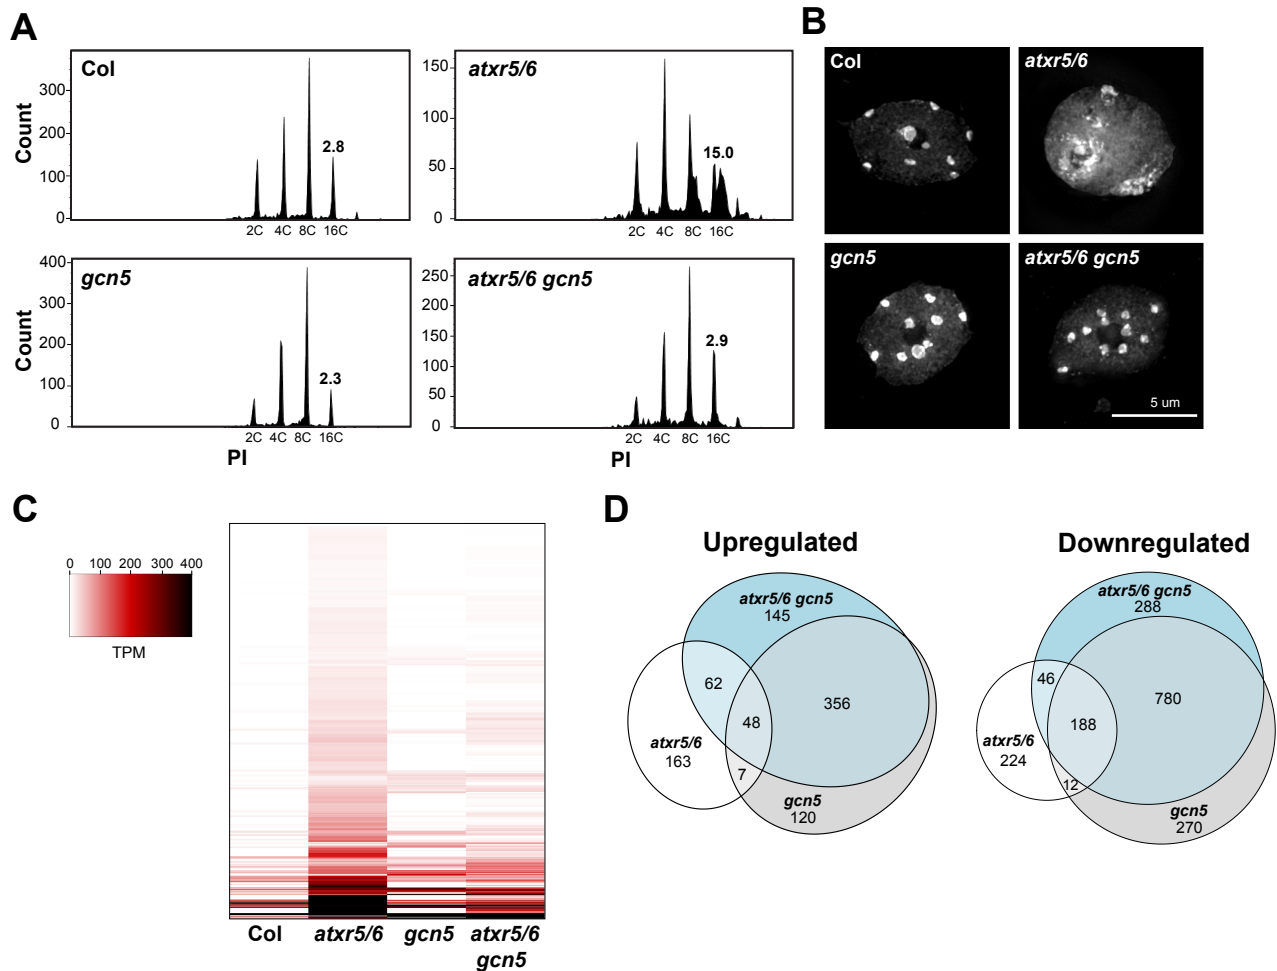

**Figure 1. A mutation in *GCN5* suppresses transcriptional de-repression and heterochromatin amplification associated with H3.1K27me1 depletion.** (A) Flow cytometry profiles of Col, *atxr5/6*, *gcn5* and *atxr5/6 gcn5* nuclei stained with propidium iodide (PI) with 2000 gated events. The numbers below the peaks indicate ploidy levels of the nuclei. The numbers above the 16C peaks indicate the robust coefficient of variation (CV). (B) Leaf interphase nuclei of Col, *atxr5/6*, *gcn5* and *atxr5/6 gcn5* stained with DAPI. (C) Heat map showing the relative expression levels of *atxr5/6*-induced TEs (Supplemental Table 1) as measured by TPM (transcripts per million) in Col, *atxr5/6*, *gcn5* and *atxr5/6 gcn5*. (D) Euler diagrams showing the upregulated and downregulated genes (2-fold change) in *atxr5/6*, *gcn5* and *atxr5/6 gcn5* in comparison to Col plants ( $P_{adj} < 0.05$ ).

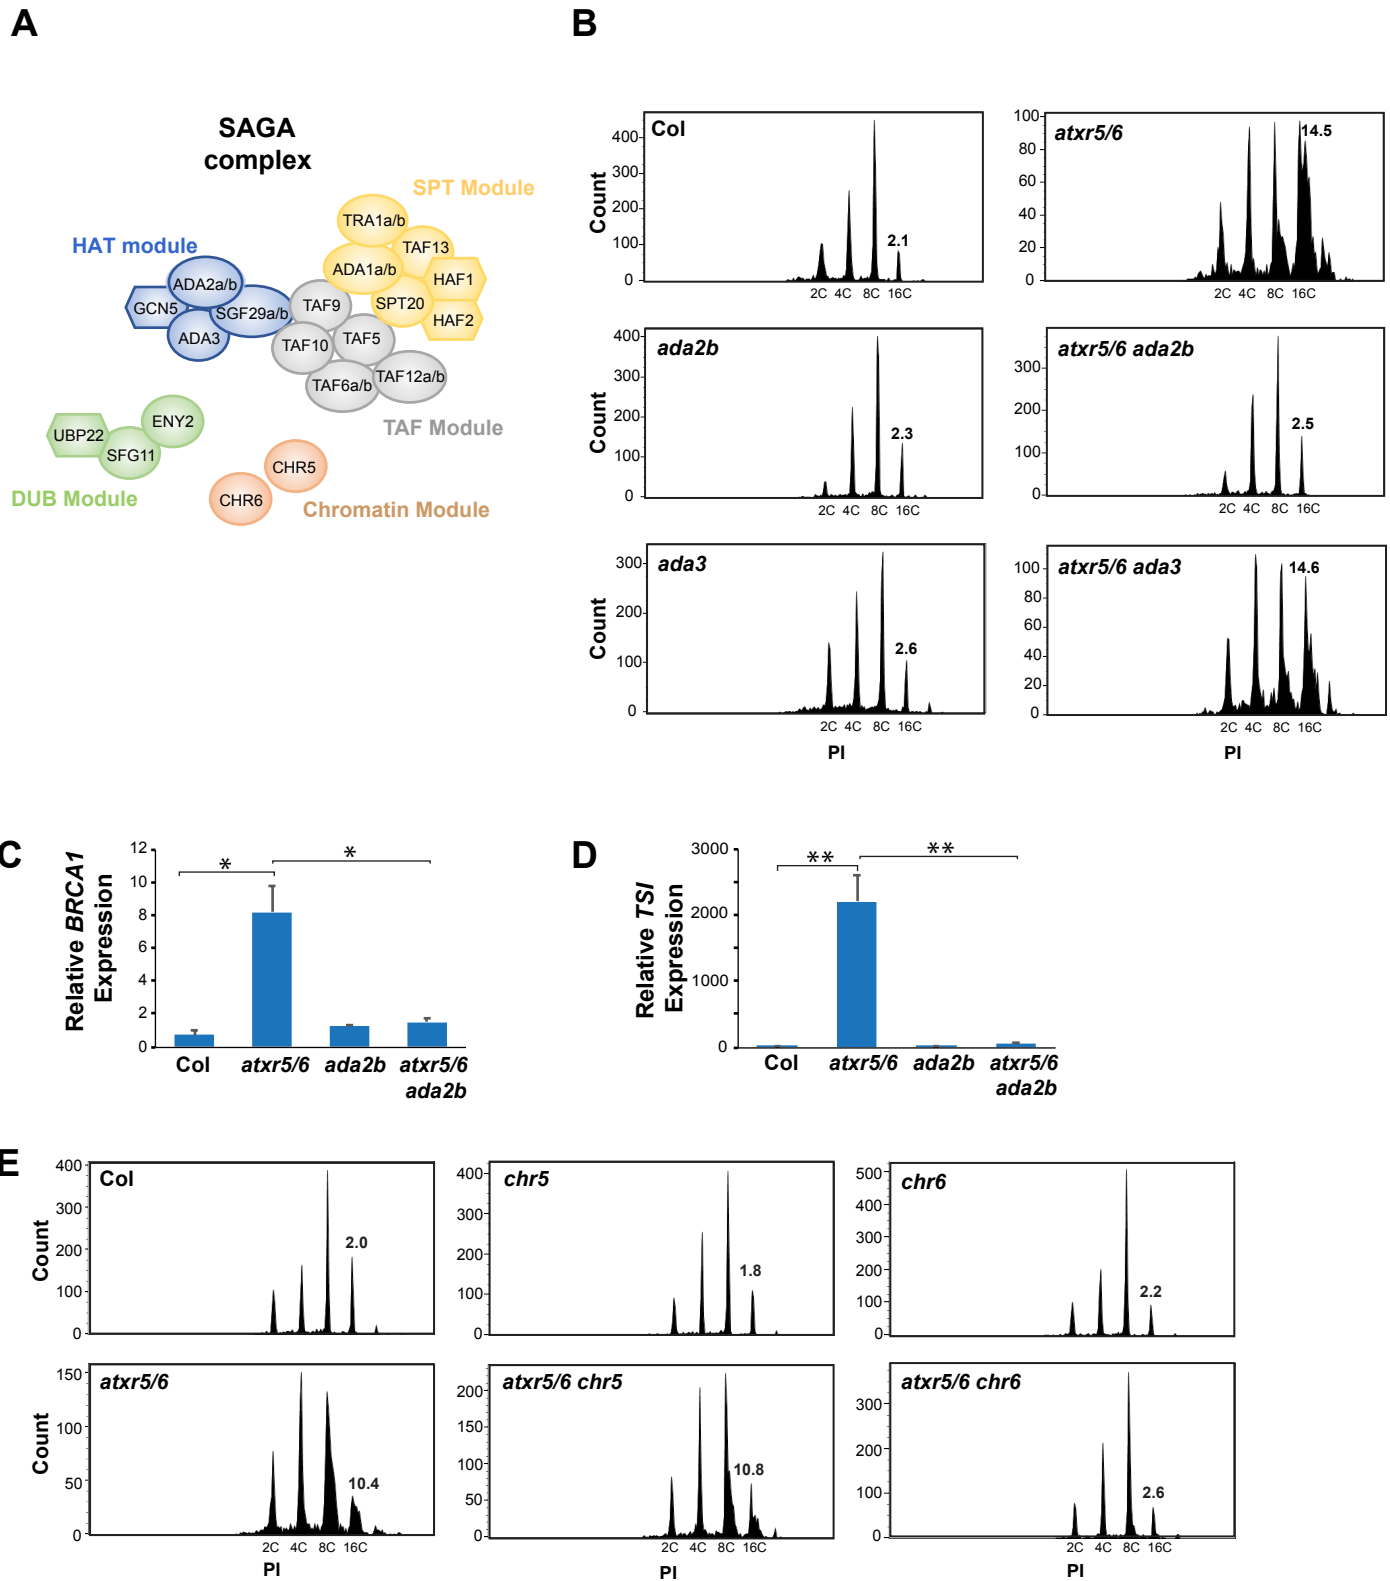

**Figure 2. GCN5 requires ADA2b to induce heterochromatic defects in *atxr5/6* mutants.** (A) Proposed subunits of the Arabidopsis SAGA complex. HAT: histone acetylation module; DUB: deubiquitination module; SPT: recruiting module; TAF; coactivator architecture module. (B) Flow cytometry profiles of Col, *atxr5/6*, *ada2b*, *atxr5/6 ada2b*, *ada3*, and *atxr5/6 ada3*. (C and D) RT-qPCR analyses of *BRCA1* (C) and the repetitive element *TSI* (D) in Col, *atxr5/6*, *ada2b* and *atxr5/6 ada2b*. Data represent the mean of three biological replicates and error bars indicate the standard error of the mean (SEM). Unpaired t-test: \*  $p < 0.01$ , \*\*  $p < 0.001$ . (E) Flow cytometry profiles of Col, *atxr5/6*, *chr5*, *atxr5/6 chr5*, *chr6*, and *atxr5/6 chr6*.

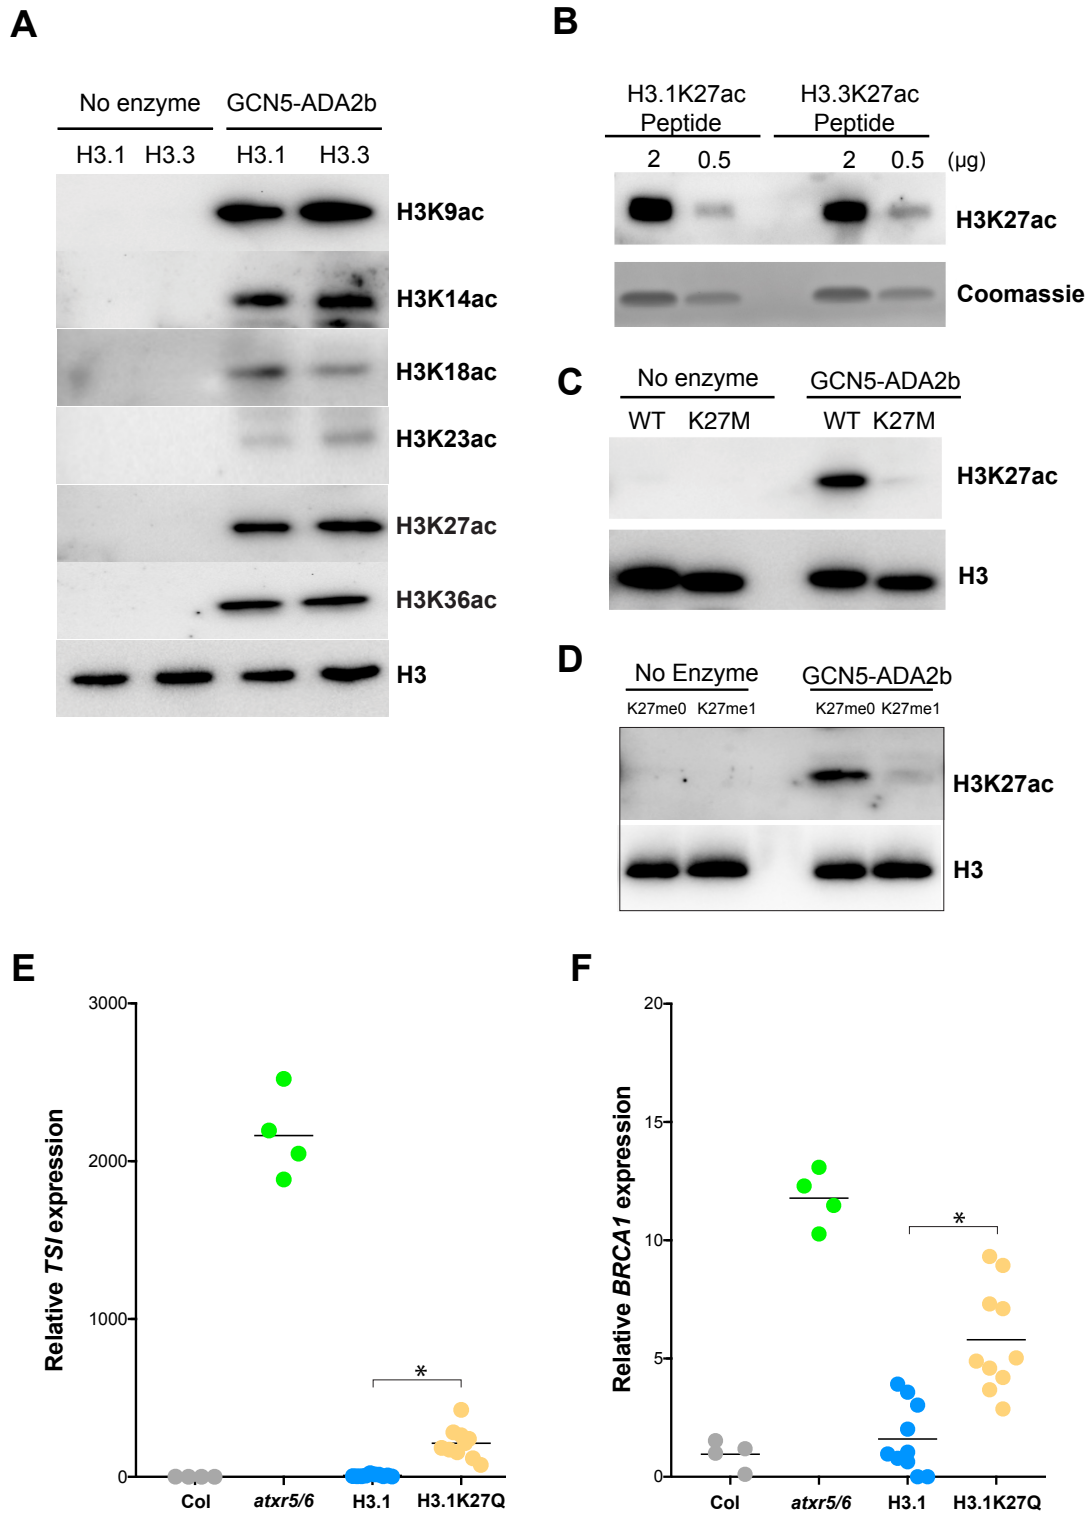

**Figure 3. Arabidopsis GCN5 acetylates H3.1K27 and induces the heterochromatic defects associated with *atxr5/6*.** (A) *In vitro* HAT assays with the GCN5-ADA2B complex and H3.1 and H3.3 nucleosomes using anti-H3K9ac, anti-H3K14ac, anti-H3K18ac, anti-H3K23ac, anti-H3K27ac, anti-H3K36ac and anti-H3 antibodies. (B) Western blot of H3.1K27ac and H3.3K27ac peptides with H3K27ac antibody. (C) *In vitro* HAT assay with the GCN5-ADA2B complex and H3K27M nucleosomes. (D) *In vitro* HAT assays with the GCN5-ADA2B complex and H3K27me0 and H3K27me1 nucleosomes using anti-H3K27ac, anti-H3 antibodies (E and F) RT-qPCR for the heterochromatic transcriptional reactivation marker *TSI* (E) and the genome stability marker *BRCA1* (F) in Col, *atxr5/6* and first-generation transformed (T1) plants expressing WT H3.1 or H3.1K27Q. Ten independent T1 plants were used in the experiments. Unpaired t-test: \*  $p < 0.001$ .

**A**

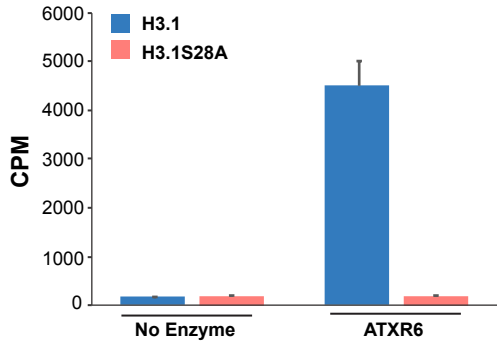

**B**

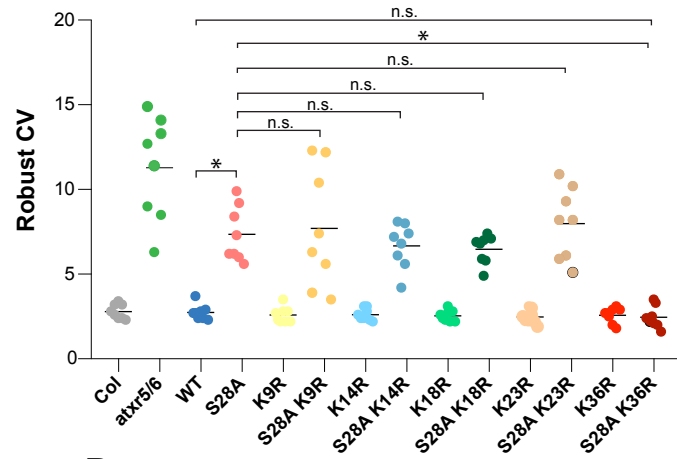

**C**

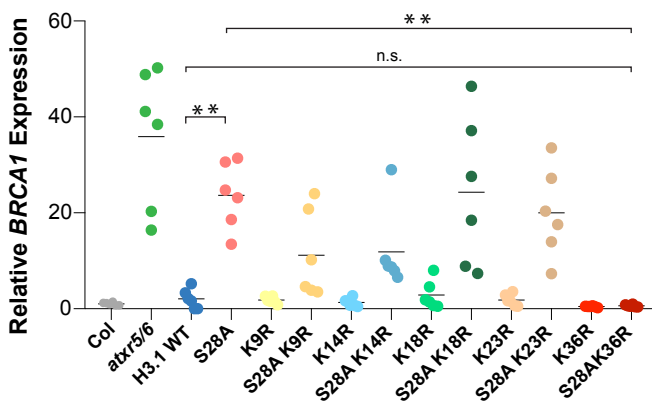

**D**

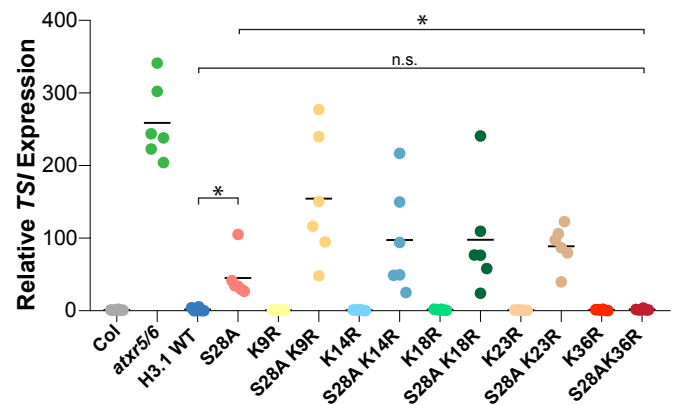

**E**

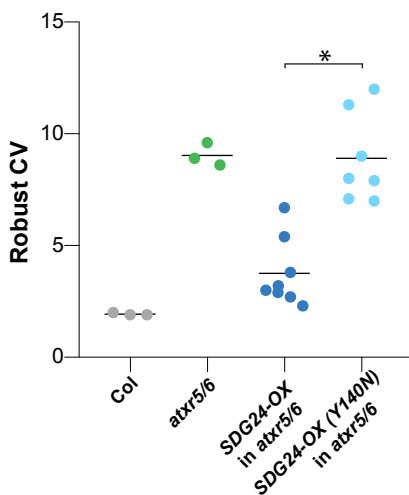

**F**

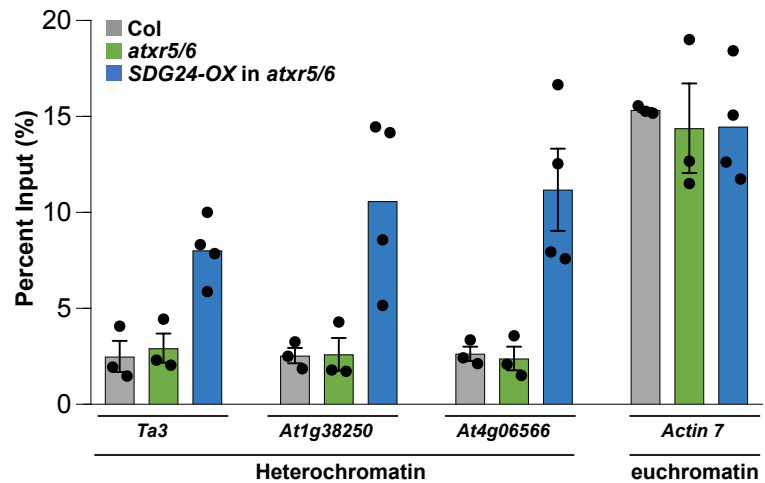

**Figure 4. Heterochromatin amplification in the absence of H3.1K27me1 requires H3.1K36** (A) *In vitro* histone lysine methylation assays using H3.1 and H3.1S28A peptide substrates and ATXR6. The average of three experiments and SEM are shown. CPM; counts per minute (B) Robust CV values for 16N nuclei obtained by flow cytometry analysis. For Col and *atxr5/6*, each dot represents an independent biological replicate. For the H3.1 replacement lines, each dot represents one T1 plant. Horizontal bars indicate the mean. Unpaired t-test: \*  $p < 0.0001$  and n.s. = not significantly different. (C and D) RT-qPCR analyses of *BRCA1* (C) and the repetitive element *TSI* (D) in Col, *atxr5/6* and H3.1 replacement lines. For Col and *atxr5/6*, each dot represents an independent biological replicate. For the H3.1 lines, each dot represents one T1 plant. Horizontal bars indicate the mean. Unpaired t-test: \*  $p < 0.01$ , \*\*  $p < 0.0005$  (E) Flow cytometry analyses showing robust CV values for 16N nuclei. For the *SDG24-OX* lines, each dot represents one T1 plant. Horizontal bars indicate the mean. Unpaired t-test: \*  $p < 0.001$ . (F) H3K36me3 ChIP-qPCR at *Ta3*, *At1g38250*, *At4g06566* and *Actin7*. For Col and *atxr5/6*, each dot represents an independent biological replicate. For the *SDG24-OX* lines, each dot represents one T1 plant. Bars indicate the mean. Error bars indicate SEM.

**A**

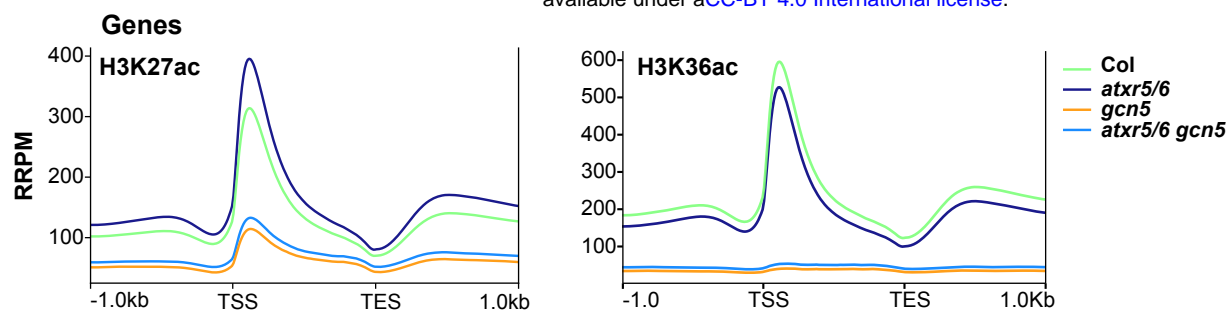

**B**

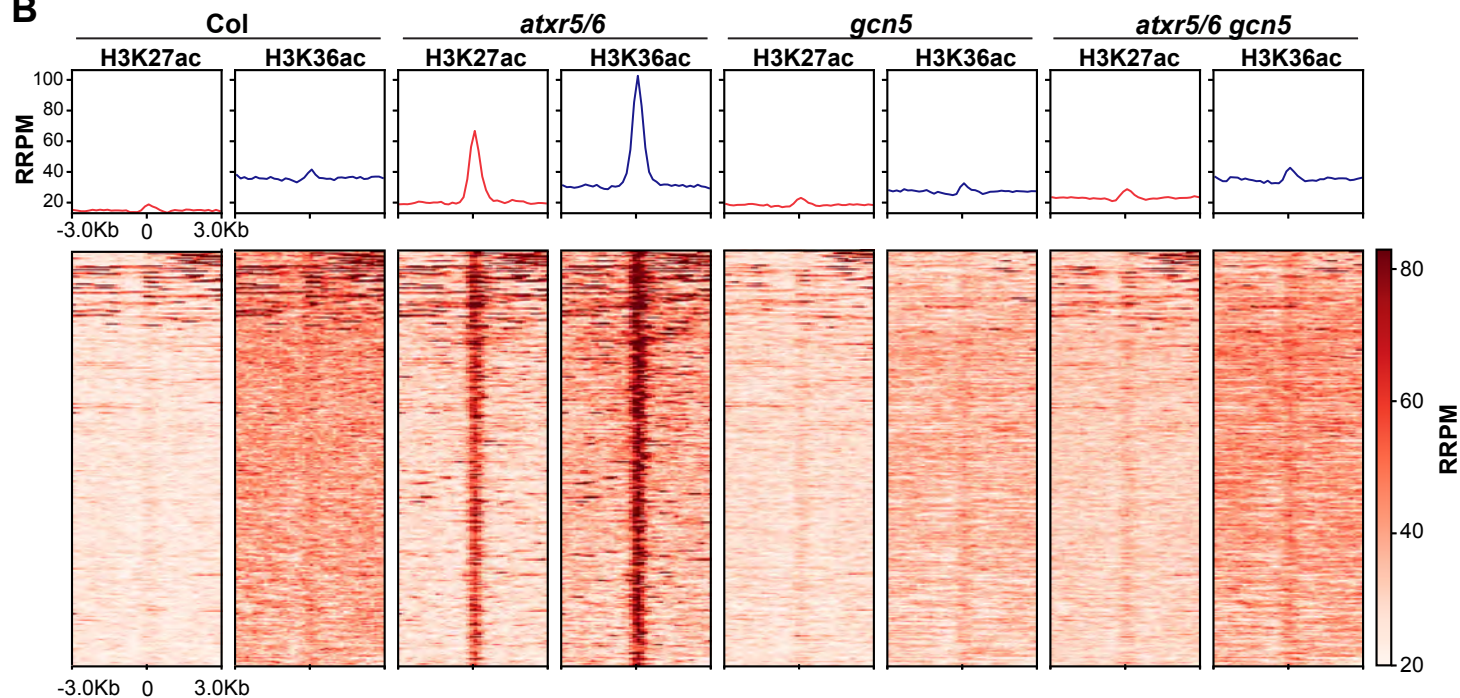

**C**

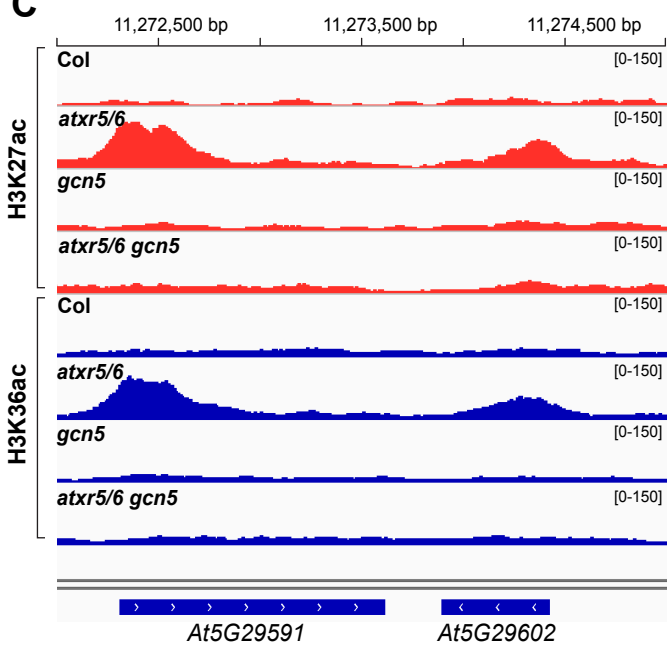

**D**

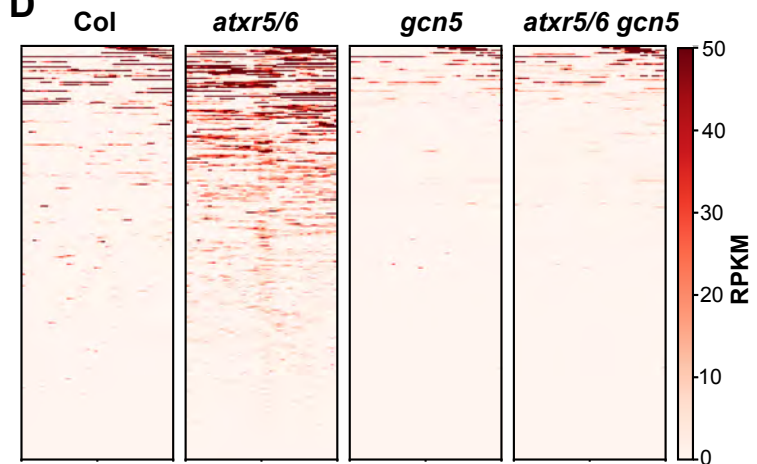

**Figure 5. Mutations in *atxr5/6* lead to an increase in H3K27ac and H3K36ac in heterochromatin.** (A) Normalized average distribution of H3K27ac and H3K36ac over protein coding genes for Col, *atxr5/6*, *gcn5* and *atxr5/6 gcn5* in reference-adjusted reads per million (RRPM). TSS, transcription start site; TES, transcription end site. (B) Normalized average distribution and heatmap of H3K27ac and H3K36ac normalized reads surrounding the H3K27ac/H3K36ac enriched heterochromatic regions in *atxr5/6* compared to Col. (C) Genome browser snapshot showing normalized H3K27ac and H3K36ac ChIP-seq data over a region of chromosome 5 that includes TE genes *At5g29591* and *At5g29602*. The y-axis unit is RRPM. (D) Heatmap showing the RNA-seq reads mapping to the region 3 kb around the center of H3K27ac/H3K36ac peaks as measured by RPKM (reads per kilobase million) in Col, *atxr5/6*, *gcn5* and *atxr5/6 gcn5*.

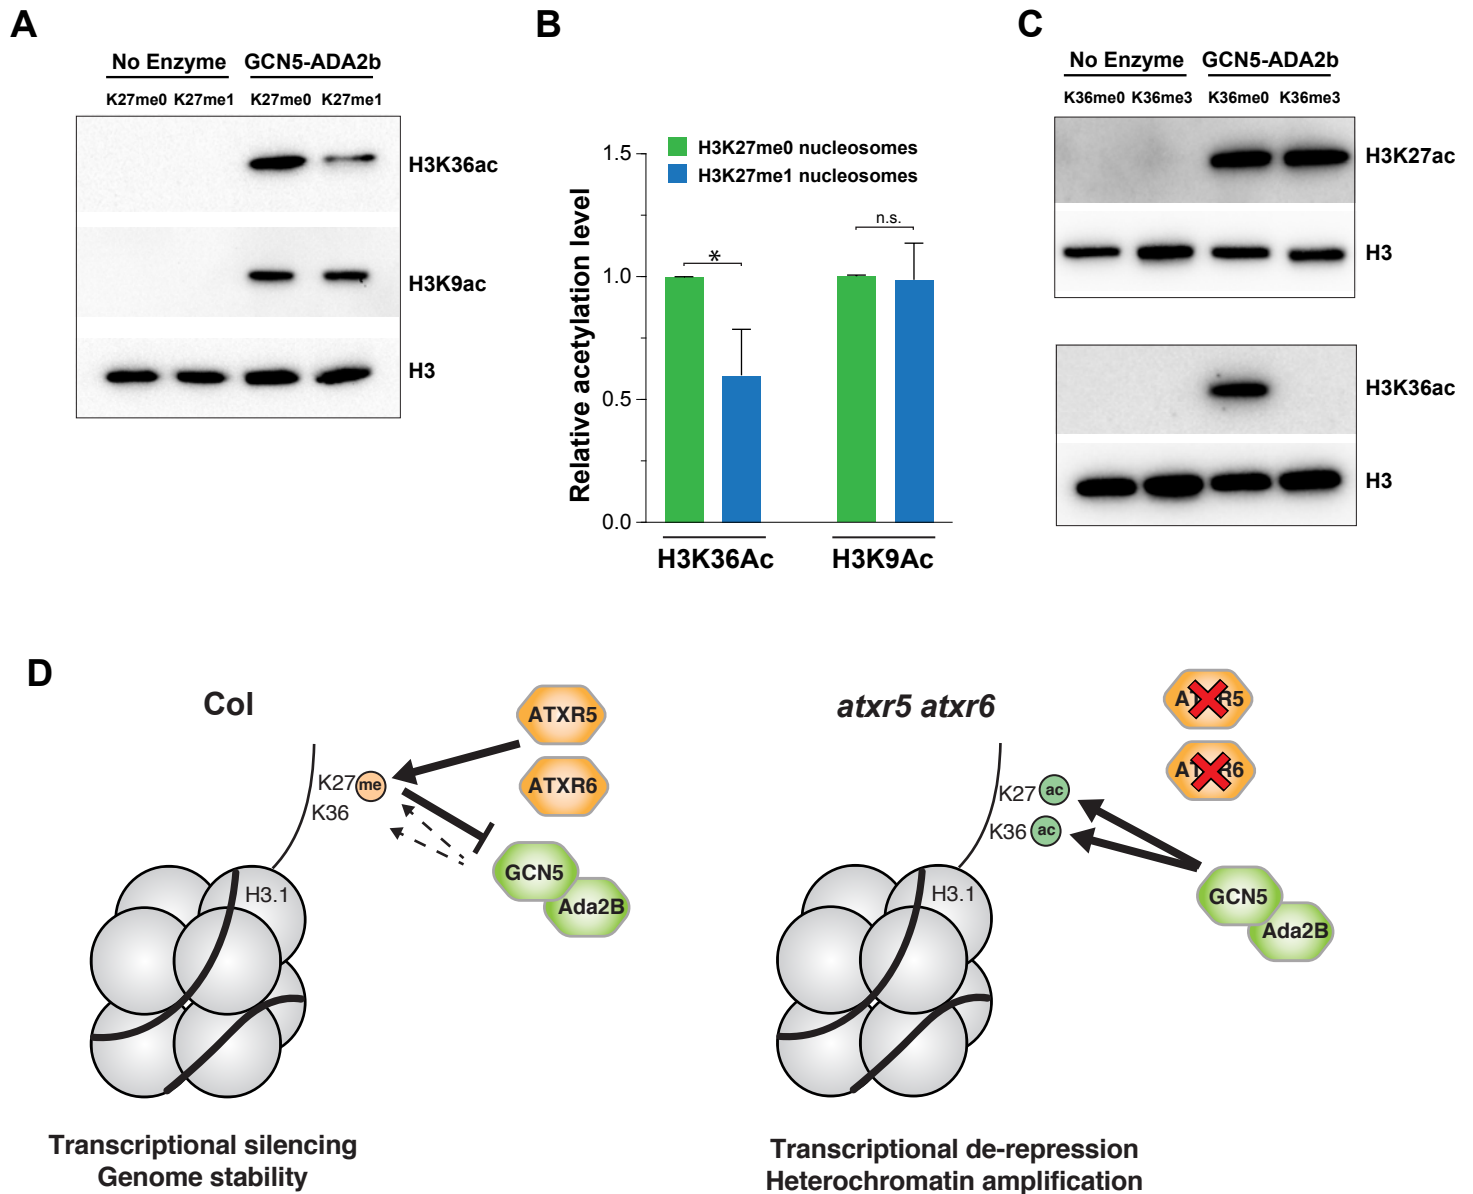

**Figure 6. H3K36 acetylation by the GCN5-ADA2B complex is regulated by H3K27me1.** (A) *In vitro* HAT assays with the GCN5-ADA2b complex and H3K27me0 and H3K27me1 nucleosomes. (B) Data from three technical replicates of HAT assays with the GCN5-ADA2b complex and H3K27me0 and H3K27me1 nucleosomes. Unpaired t-test: \*  $p < 0.05$ , and n.s. = not significantly different. (C) *In vitro* HAT assays with the GCN5-ADA2b complex and H3K36me0 and H3K36me3 nucleosomes. (D) Model depicting the role of H3.1K27me1 in blocking GCN5-mediated acetylation of H3.1K27ac and H3.1K36ac.

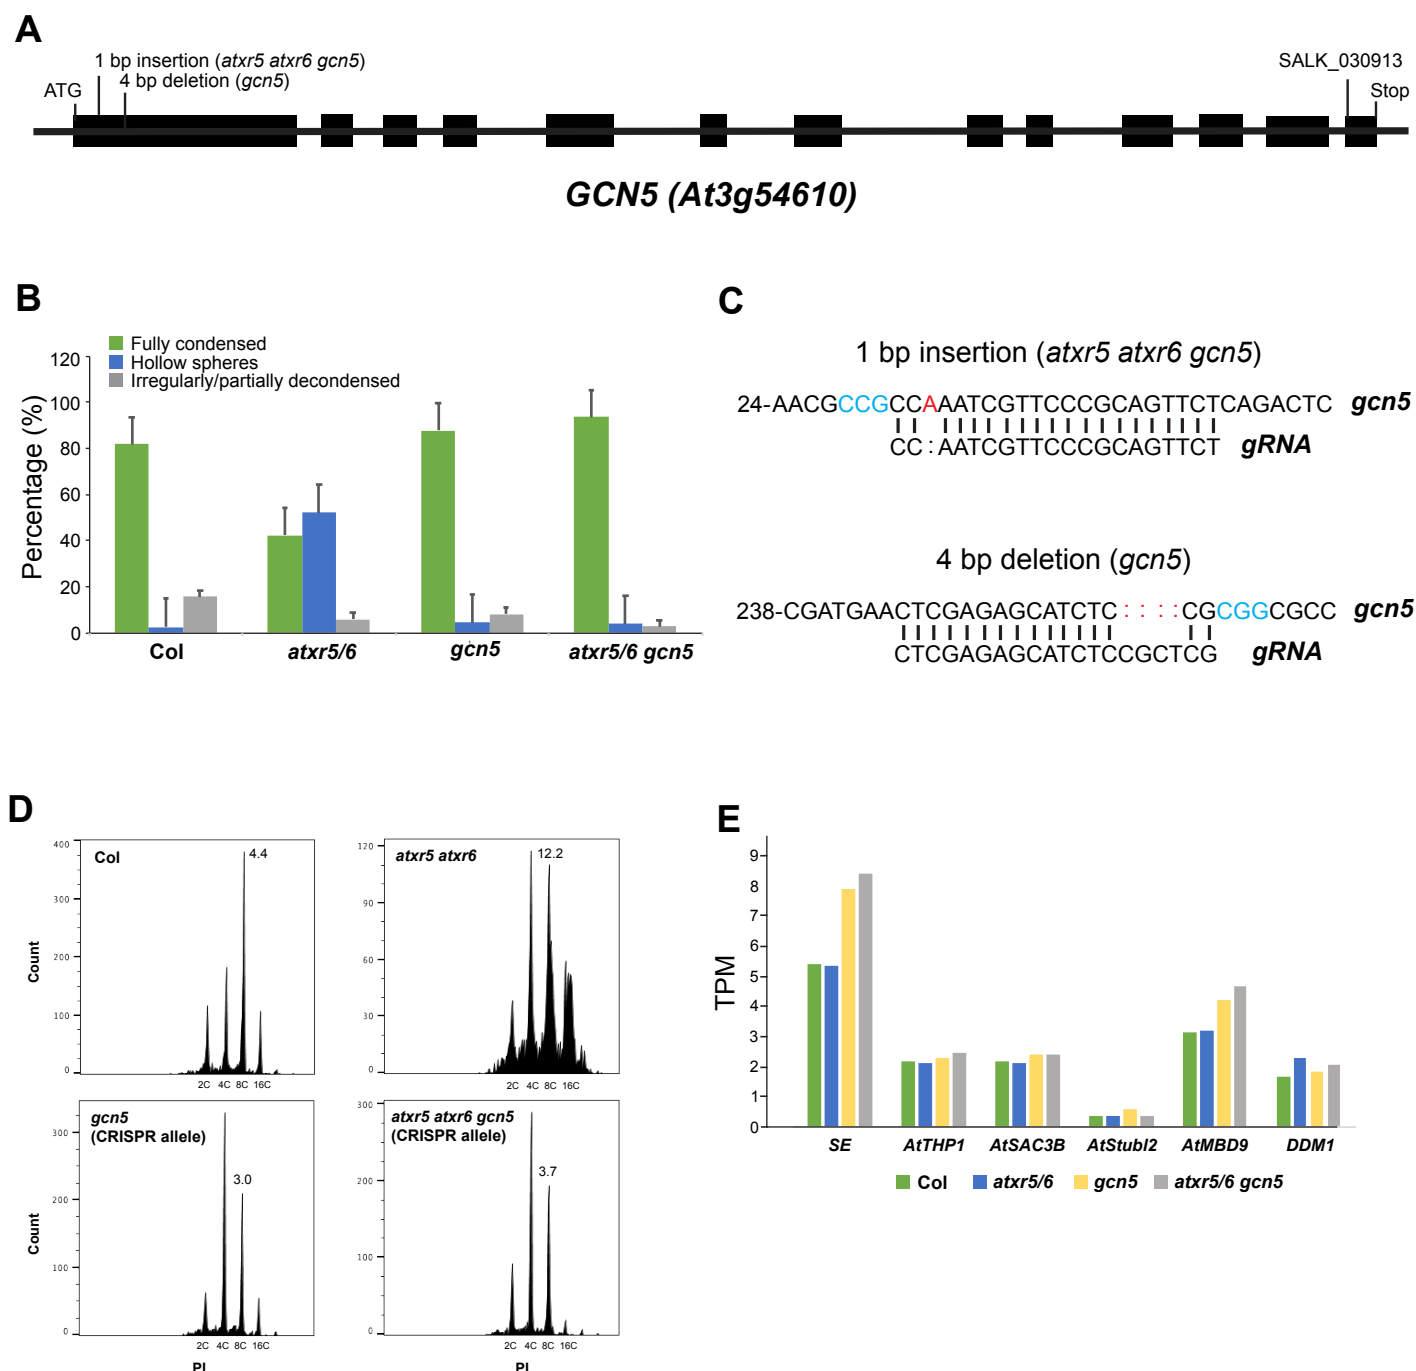

**Supplemental Figure 1. Effect of *GCN5* on genome stability and transcriptional de-repression.** (A) Gene structure for *GCN5*. Exons are highlighted as black boxes. The location of the mutations in the *gcn5* alleles used in this study are shown. (B) Quantification of chromocenter appearance. Shown is the percentage of nuclei that are fully condensed (green), hollow spheres characteristic of the *atxr5/6* mutant plants (blue) and irregularly/partially decondensed (grey). At least 25 nuclei for 3 biological replicates of each genotype were assessed. Error bars indicate SEM (C) CRISPR-induced mutations of *GCN5* in Col and *atxr5/6* backgrounds. Mutations (red) and PAM motif (blue) are shown. (D) Flow cytometry profiles of Col, *atxr5/6* and the CRISPR-induced knockout allele of *gcn5* in Col and the *atxr5/6* mutant background. The numbers below the peaks indicate ploidy levels of the nuclei. The numbers above the 8C peaks indicate the robust CV. (E) Gene expression levels in our RNA-seq experiments for the known suppressors of transcriptional de-repression in *atxr5/6*.



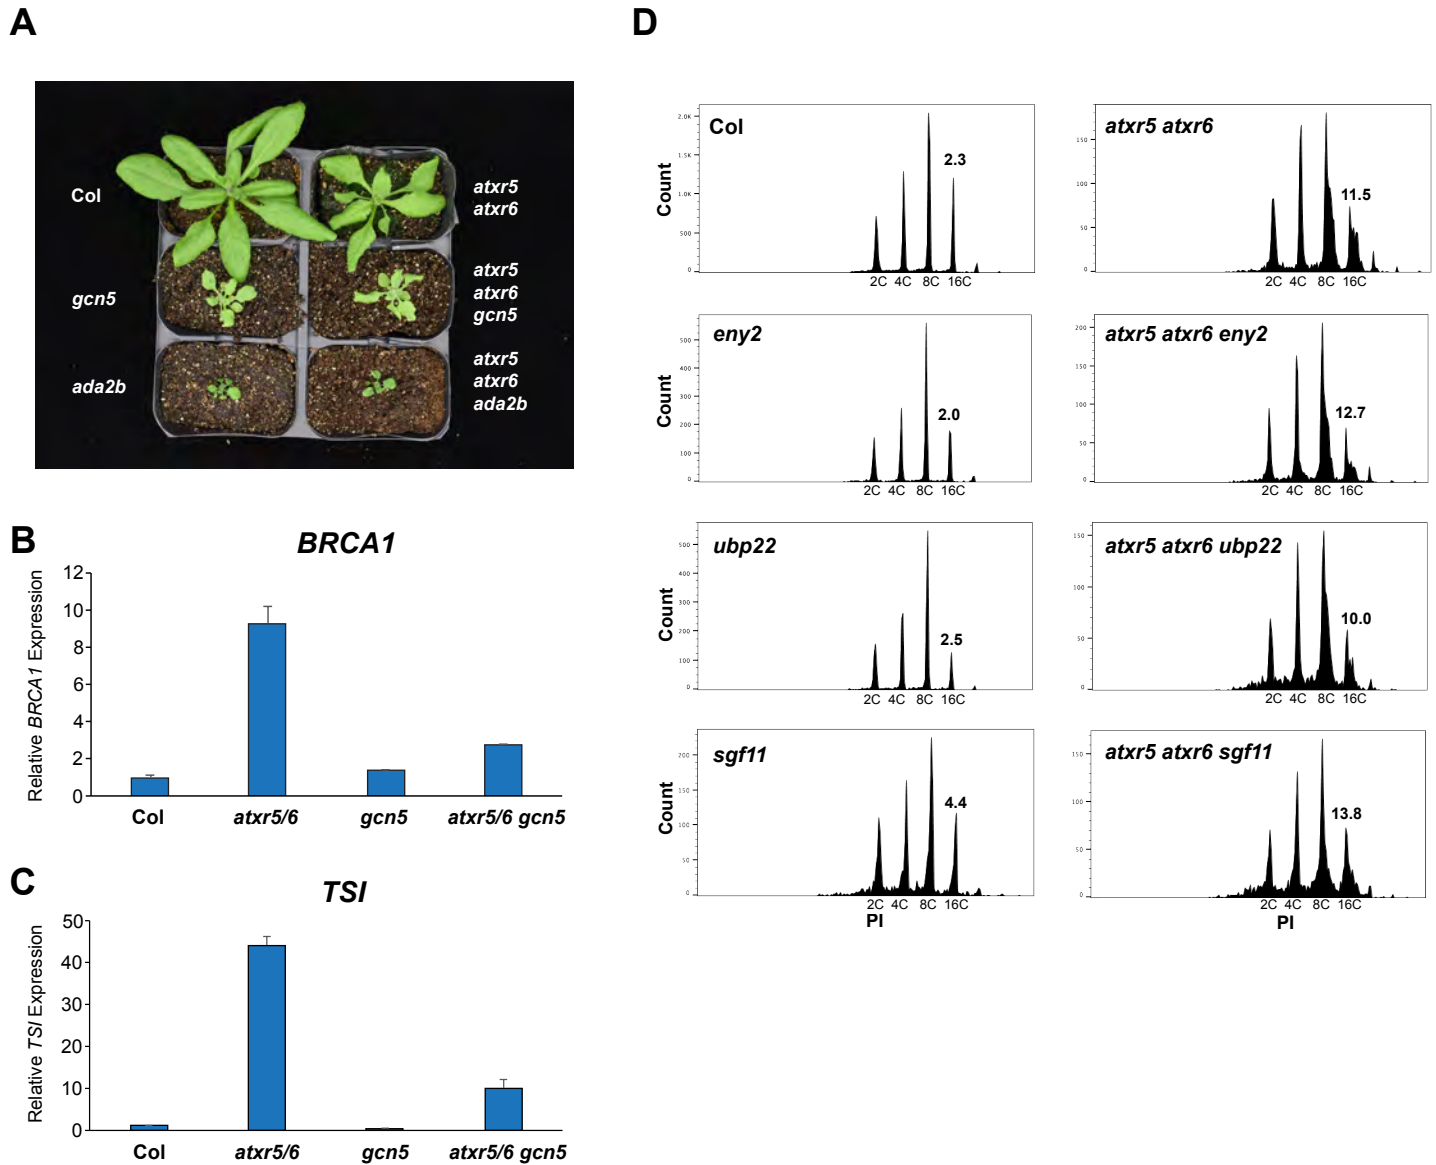

**Supplemental Figure 2. Role of SAGA-related proteins in transcriptional de-repression and genome stability.** (A) Growth phenotype of *gcn5* and *ada2b* single mutants and in combination with *atxr5/6*. (B and C) RT-qPCR for the genome stability marker *BRCA1* (B) and the heterochromatic transcriptional reactivation marker *TSI* (C). The average of three biological replicates and SEM are shown. (D) Flow cytometry profiles of the mutant alleles of genes predicted to code for subunits of SAGA in plants. The Robust CV value calculated for the 16C peak on each plot is used as a measure of heterochromatin amplification.

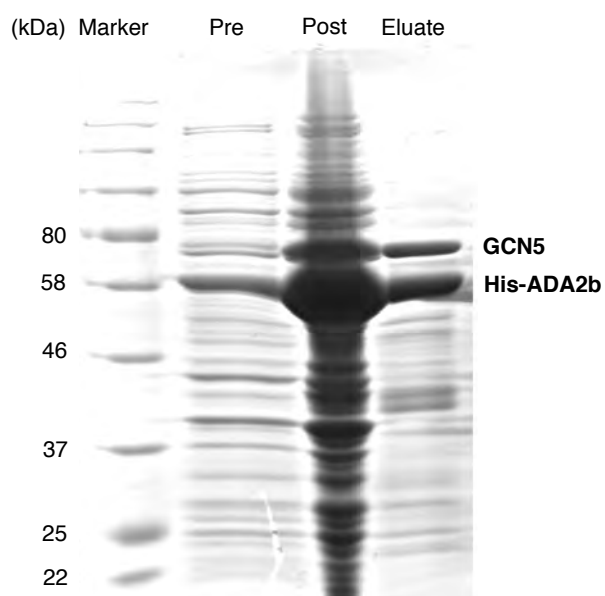

**Supplemental Figure 3. Purification of the GCN5-ADA2b complex.** Coomassie-stained gel showing GCN5-ADA2b protein expression either pre- or post-induction in *E. coli*, or after affinity purification (eluate).

**A**

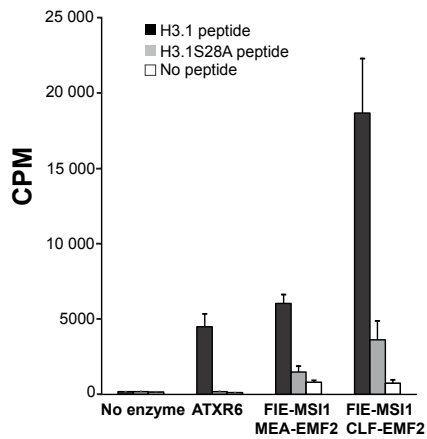

**B**

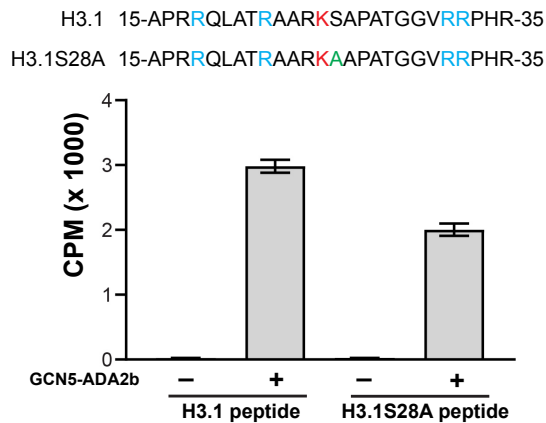

**Supplemental Figure 4. *In vitro* histone modification assays.** (A) *In vitro* histone lysine methylation assays at H3.1K27 using peptide substrates, ATXR6 and plant PRC2 complexes. The average of three experiments and SEM are shown. (B) *In vitro* HAT assays using H3.1 peptides. Lysine (K) to arginine (R) mutations were introduced (blue) on the peptides at other potential targets (H3.1K18, H3.1K23, H3.1K36 and H3.1K37) of GCN5-ADA2b, so that the acetylation signal could be specifically measured at H3.1K27 (red). H3.1S28A is shown in green. The average of three experiments and SEM are shown.

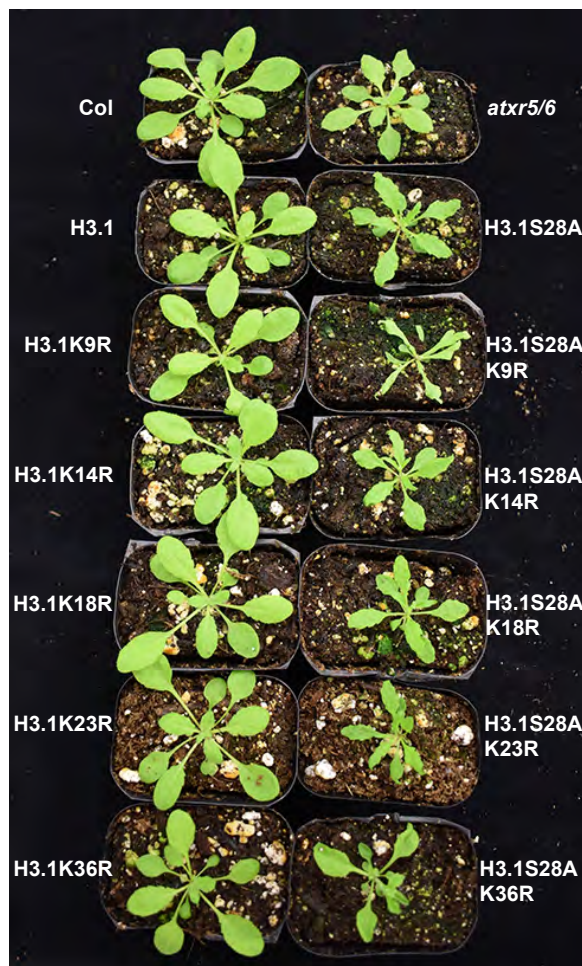

**Supplemental Figure 5. Growth and developmental phenotypes of T1 plants expressing different H3.1 transgenes.**

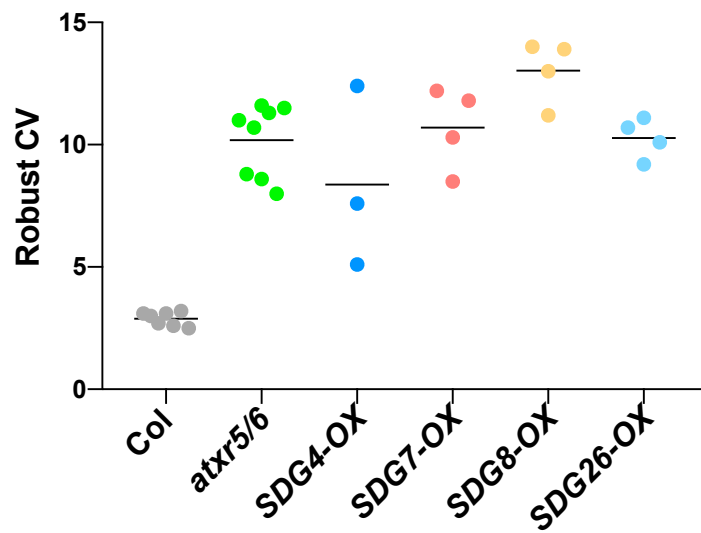

**Supplemental Figure 6. Robust CV values for 16N nuclei obtained by flow cytometry analyses.** For Col and *atxr5/6*, each dot represents an independent biological replicate. For overexpression lines, each dot represents one first-generation transformed (T1) plant.

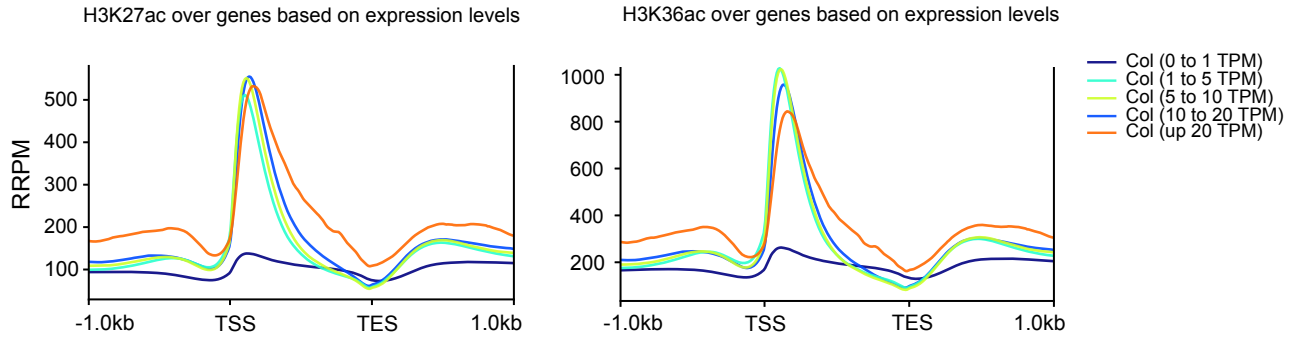

**Supplemental Figure 7. Average distribution of H3K27ac and H3K36ac over protein-coding genes grouped by their expression levels.** TSS, transcription start site; TES, transcription end site.

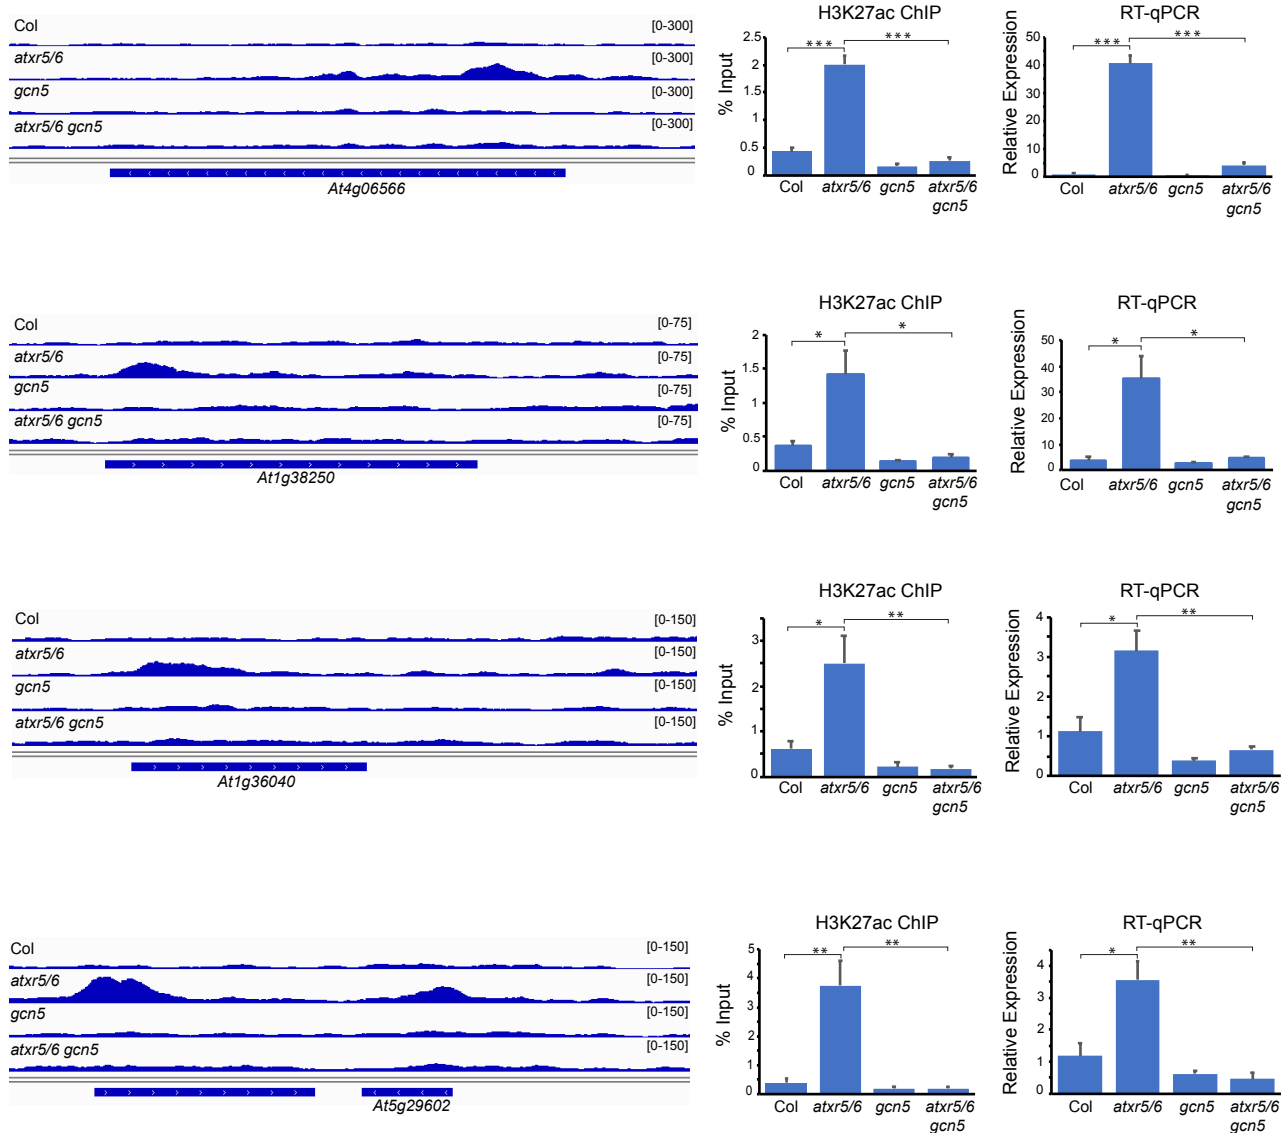

**Supplemental Figure 8. Validation of ChIP-seq and RNA-seq analyses.** Genome browser snapshots at different TEs showing H3K27ac enrichment in *atxr5/6*, ChIP-qPCR confirmation of H3K27ac enrichment and expression levels for these TEs. *At4g06566* and *At1g38250* were detected as de-repressed in *atxr5/6* by RNA-seq, but not *At1g36040* or *At5g29602*. Data represents the mean of three biological replicates and error bars indicate SEM. Unpaired t-test: \*  $p < 0.05$ , \*\*  $p < 0.01$  and \*\*\*  $p < 0.001$ .

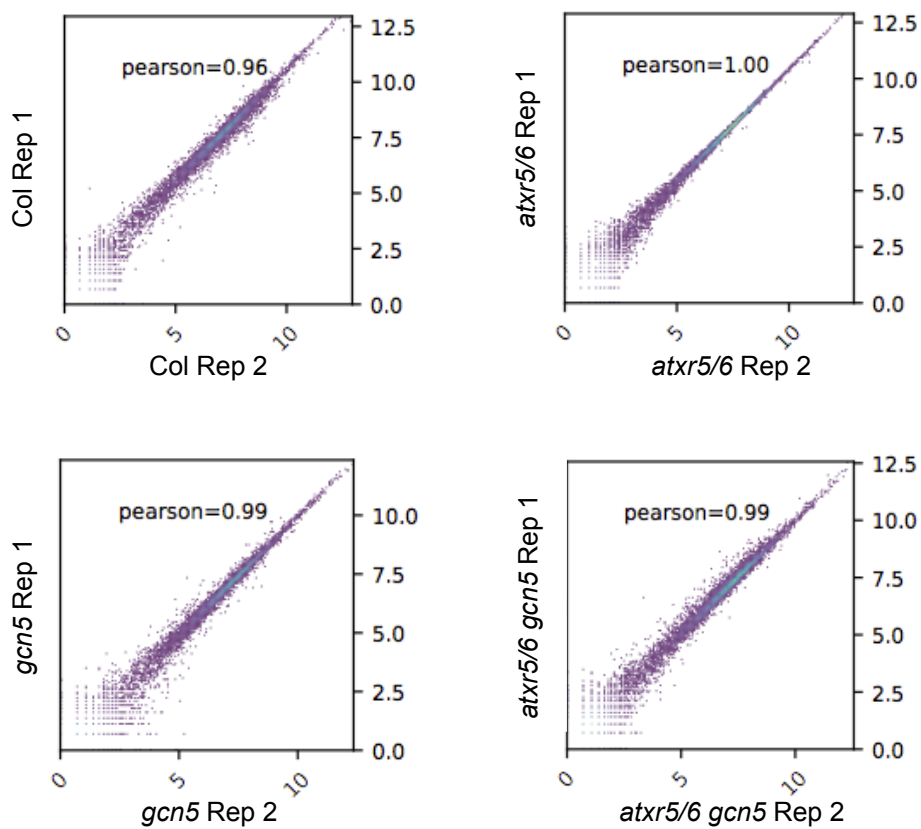

**Supplemental Figure 9. Scatterplots and Pearson correlation coefficients for RNA-seq replicates of Col, *atxr5/6*, *gcn5* and *atxr5/6 gcn5*.**



### H3K27ac ChIP-seq

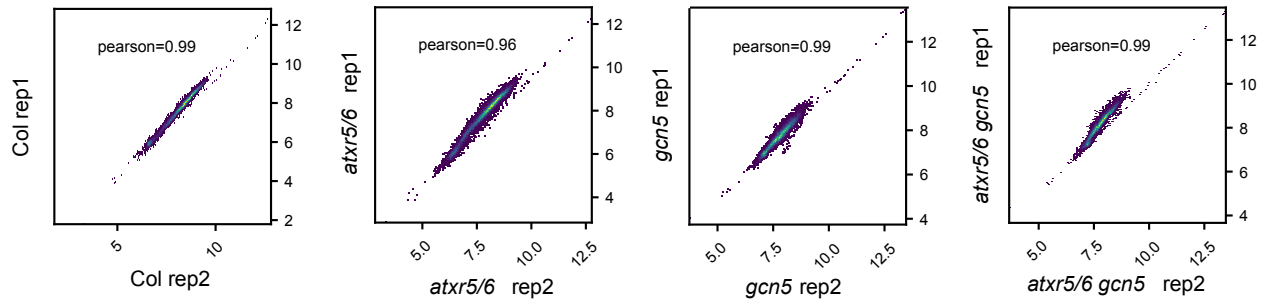

### H3K36ac ChIP-seq

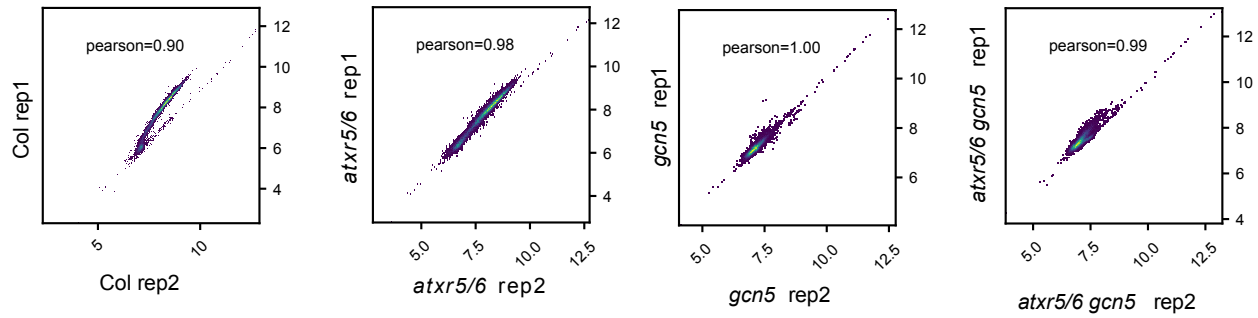

**Supplemental Figure 10. Scatterplots and Pearson correlation coefficients for H3K27ac and H3K36ac ChIP-seq replicates of Col, *atxr5/6*, *gcn5* and *atxr5/6 gcn5*.**

|                                        | <b>Col Rep1</b>   | <b>Col Rep2</b>   | <b><i>atxr5/6</i> Rep1</b> | <b><i>atxr5/6</i> Rep2</b> | <b><i>gcn5</i> Rep1</b> | <b><i>gcn5</i> Rep2</b> | <b><i>atxr5/6 gcn5</i> Rep1</b> | <b><i>atxr5/6 gcn5</i> Rep2</b> |
|----------------------------------------|-------------------|-------------------|----------------------------|----------------------------|-------------------------|-------------------------|---------------------------------|---------------------------------|
| <b>D. melanogaster unique H3 reads</b> | 51265             | 134411            | 69402                      | 104229                     | 114932                  | 100768                  | 69215                           | 115431                          |
| <b>A. thaliana unique H3 reads</b>     | 30827170          | 57924375          | 39621511                   | 50359868                   | 54725117                | 44476014                | 49878156                        | 44258118                        |
| <b>% of D. melanogaster H3 reads</b>   | 0.16629811        | 0.23204566        | 0.17516243                 | 0.20696837                 | 0.21001691              | 0.22656707              | 0.13876816                      | 0.26081317                      |
| <b>D. melanogaster H3K27ac reads</b>   | 73203             | 154549            | 69048                      | 88588                      | 211097                  | 172676                  | 161463                          | 171638                          |
| <b>A. thaliana H3K27ac reads</b>       | 35425890          | 53958274          | 39611214                   | 38922755                   | 34654299                | 36321638                | 50898781                        | 35808072                        |
| <b>H3K27ac Rx factor</b>               | <b>2.2717389</b>  | <b>1.50143749</b> | <b>2.53682114</b>          | <b>2.33630259</b>          | <b>0.99488344</b>       | <b>1.31209355</b>       | <b>0.85944248</b>               | <b>1.51955376</b>               |
| <b>D. melanogaster H3K36ac reads</b>   | 100430            | 134550            | 120870                     | 126640                     | 355181                  | 302930                  | 35828                           | 223401                          |
| <b>A. thaliana H3K36ac reads</b>       | 40539185          | 47383778          | 38801208                   | 41274576                   | 20973432                | 19928195                | 25937684                        | 18896708                        |
| <b>H3K36ac Rx factor</b>               | <b>1.65586086</b> | <b>1.72460545</b> | <b>1.44918033</b>          | <b>1.63430491</b>          | <b>0.59129545</b>       | <b>0.74791888</b>       | <b>0.413212005</b>              | <b>1.167466434</b>              |

**Supplemental Table 6. Rx factors**

| Gene                      | Forward Primer                     | Reverse Primer                             |
|---------------------------|------------------------------------|--------------------------------------------|
| <b>Cloning</b>            |                                    |                                            |
| ADA2B into pETDuet-1      | caggctcgacATGGGTCTCGAGGG<br>AACTTC | cttgcgccgcTTAAAGTTGAGCAATACCCCTTCTT<br>CAC |
| GCN5 into pETDuet-1 ADA2B | tggatatcg<br>ATGGACTCTCACTCTTCCCAC | agcttaattaaCTATTGAGATTTAGCACCAGATTG        |
| <b>RT-qPCR</b>            |                                    |                                            |
| BRCA1                     | CATGTGCCTTTTGTCTAGTGTTTC-3'        | TGGAGCCCATTTCAGCACAGTTT                    |
| TSI                       | ATCCAGTCCGAAGAACGCGAACTA           | TCACTTGTGAGTGTTTCGTGAGGTC                  |
| Actin                     | TCGTGGTGGTGAGTTTGTTAC              | CAGCATCATCACAAGCATCC                       |
| At1G38250                 | CAACAAGCCGCCAAGTTCCTA              | AGGGTTTAGTGGCTCTTGGAG                      |
| At4G06566                 | GTGAAACATATCCCACGCACT              | GGATAGTTATGAGCAAGTGGT                      |
| At1G36040                 | CTTTGACTCAGCGCAAGAGA               | GAGGCAGATCGGTTGGATTT                       |
| At5G29602                 | ACAGAGGACTCGTCAGTCG                | ATGGTGAGCTCTCAACAATCTC                     |
| <b>ChIP-qPCR</b>          |                                    |                                            |
| Ta3                       | GAGAGCAAACAGAGTGAGGCTCGT           | TCGTGCCATCGATCAGAATCAAG                    |
| Actin 7                   | GCTGCTCGTTAGTCGTTATTGTTG           | CAAGCACGGATCGAATCACATAAC                   |
| At1G38250                 | GCTTCACCATGAGTTCAAACAG             | CAAGCCTAGTAGACCAAGATTCA                    |
| At4G06566                 | GTGAAACATATCCCACGCACT              | GGATAGTTATGAGCAAGTGGT                      |
| At1G36040                 | CTTTGACTCAGCGCAAGAGA               | GAGGCAGATCGGTTGGATTT                       |
| At5G29602                 | ACAGAGGACTCGTCAGTCG                | ATGGTGAGCTCTCAACAATCTC                     |

**Supplemental Table 7. Cloning and PCR primers**
